# Supplementary material for: Spatio-temporal control of mutualism in legumes helps spread symbiotic nitrogen fixation
Source: eLife. 2017 Oct 12;6:e28683. doi: 10.7554/eLife.28683 (PMC5687860; doi:10.7554/eLife.28683)
Supplement: Figure 1—source data 2. [file elife-28683-fig1-data2.xlsx]

## Sheet: co-infection
Figure 1B-Source Data 2. Reproductive fitness of nodule bacteria in nodules co-infected by Fix+ (CBM2700) and Fix- (CBM2707) C. taiwanensis.
Time	Independent experiment	Nodule	Fix+ bacteria/nodule	Fix- bacteria/nodule	ratio Fix+/Fix-
14 dpi	1	1	760000	740000	1.02703
14 dpi	1	2	3900000	253123	15.4075
14 dpi	1	3	1.35659e+07	7.59369e+06	1.78647
14 dpi	2	1	53000	729783	0.0726243
14 dpi	2	2	1.72222e+06	27000000	0.063786
14 dpi	2	3	3e+06	1.72481e+07	0.173933
14 dpi	3	1	1.14341e+07	30500000	0.374889
14 dpi	3	2	3.61111e+07	10800000	3.34362
14 dpi	3	3	8.91473e+06	43500000	0.204936
14 dpi	3	4	6.39535e+06	7.75194e+06	0.825
14 dpi	3	5	10600000	8.91473e+07	0.118904
14 dpi	3	6	39500000	25000000	1.58
14 dpi	3	7	27284.7	9600	2.84215
14 dpi	4	1	6.31164e+06	24500000	0.257618
14 dpi	4	2	1.84089e+06	1.27907e+07	0.143924
14 dpi	4	3	720000	7.55814e+06	0.0952615
14 dpi	4	4	1.02713e+07	8.28402e+06	1.23989
35 dpi	1	1	4000	678295	0.00589714
35 dpi	1	2	3.61111e+07	2.95858e+07	1.22056
35 dpi	1	3	4.83235e+07	6600000	7.32174
35 dpi	1	4	5.42406e+07	5400000	10.0446
35 dpi	1	5	4.84496e+07	4600000	10.5325
35 dpi	1	6	7.19921e+07	900000	79.9912
35 dpi	2	1	240000	1900000	0.126316
35 dpi	2	2	760000	3.61111e+06	0.210462
35 dpi	2	3	1200000	2900000	0.413793
35 dpi	2	4	2300000	4600000	0.5
35 dpi	2	5	5000000	5000000	1
35 dpi	2	6	7000000	4700000	1.48936
35 dpi	2	7	4400000	1800000	2.44444
35 dpi	2	8	6.1e+07	9000000	6.77778
35 dpi	2	9	7300000	1020000	7.15686
35 dpi	2	10	57500000	5300000	10.8491
35 dpi	2	11	47000000	2700000	17.4074
35 dpi	2	12	2050000	105194	19.4878
35 dpi	2	13	6e+07	3e+06	20
35 dpi	2	14	39000000	1e+06	39
35 dpi	2	15	6.25e+08	1.3e+07	48.0769
35 dpi	2	16	400000000	5000000	80
35 dpi	2	17	6.75e+08	8e+06	84.375
35 dpi	2	18	16750000	190000	88.1579
35 dpi	3	1	700000	10200000	0.0686275
35 dpi	3	2	3.72222e+07	11000000	3.38384
35 dpi	3	3	4.33333e+07	10200000	4.24837
35 dpi	3	4	1.25969e+08	8700000	14.4792
35 dpi	3	5	8.57988e+07	5600000	15.3212
35 dpi	3	6	2.83333e+07	1600000	17.7083
35 dpi	3	7	1.27907e+08	6500000	19.678
35 dpi	3	8	8.1854e+07	4000000	20.4635
35 dpi	3	9	9.36884e+07	2500000	37.4753
35 dpi	3	10	140000000	3e+06	46.6667
35 dpi	3	11	153000000	3e+06	51
35 dpi	3	12	5.2e+07	1e+06	52
35 dpi	3	13	6.90335e+07	1300000	53.1027
35 dpi	3	14	8.48126e+08	10000000	84.8126
35 dpi	3	15	6.90335e+07	600000	115.056
35 dpi	3	16	3.94477e+08	2e+06	197.239
35 dpi	3	17	7.19921e+07	100000	719.921
35 dpi	3	18	1.31783e+08	100000	1317.83

## Sheet: statistics
Statistics for Figure 1B
t-test (paired data)
14 dpi	p-value = 0.0576447290828863
35 dpi	p-value = 0.000264143139859099
