# Supplementary material for: Spatio-temporal control of mutualism in legumes helps spread symbiotic nitrogen fixation
Source: eLife. 2017 Oct 12;6:e28683. doi: 10.7554/eLife.28683 (PMC5687860; doi:10.7554/eLife.28683)
Supplement: Figure 2—source data 1. [file elife-28683-fig2-data1.xlsx]

## Sheet: inoculum
Figure 1A-Figure 3-Source Data 1. Reproductive fitness of nodule bacteria following co-inoculation with Fix+ (CBM2700) and Fix- (CBM2707) C. taiwanensis.
Number of biological replicate: The experiment was performed once. The number of plants and the number of nodules analysed for each plant are indicated for each time point.
No. of GFP bacteria per tube of plants in the inoculum	No. of mCherry bacteria per tube of plants in the inoculum	ratio GFP/mCherry
1100000	1100000	1

## Sheet: 14dpi
Figure 1A-Figure 3-Source Data 1. Reproductive fitness of nodule bacteria following co-inoculation with Fix+ (CBM2700) and Fix- (CBM2707) C. taiwanensis.
Data for nodules harvested at 14 dpi
Plant	Nodule	Fix+ bacteria per nodule	Fix- bacteria per nodule
1	1	1.04651e+07
1	2	1.06589e+07
1	3	1.47287e+06
1	4	3.79684e+06
1	5	3.79684e+06
1	6		8.62403e+06
1	7		8.62403e+06
2	1	910000
2	2	760000
2	3		740000
2	4	3.38889e+06
2	5		1.72481e+07
2	6		1.61078e+06
2	7		8.87574e+06
3	1	3.64892e+06
3	2	3.64892e+06
3	3		19000000
3	4	3.64892e+06	1.53101e+07	co-infected nodule
4	1	280000
4	2		275000
4	3		275000
5	1	33000000
5	2	50500000
6	1		1.97674e+07
6	2		26500000
6	3	29000000
6	4		21000000
6	5	26000000
6	6		23500000
7	1		15500000
7	2		42500000
7	3	3900000	253123	co-infected nodule
7	4	1.35659e+07	7.59369e+06	co-infected nodule
8	1		253123
8	2		1.72222e+06
8	3		1.72222e+06
8	4		183333
8	5		9.98062e+06
8	6		9.98062e+06
8	7		1.29845e+07
9	1	1.10465e+07
9	2	4.43787e+06
	3		36000000
9	4		1.29845e+07
9	5	1.89922e+07
9	6	5.32544e+06
10	1		8.33333e+06
10	2		2750000
10	3		4.83235e+06
		Number of Fix+ nodules	Number of Fix- nodules
Total number of singly-infected nodules		19	27
Percentage of nodules		38.7755	55.102

## Sheet: 21dpi
Figure 1A-Figure 3-Source Data 1.Reproductive fitness of nodule bacteria following co-inoculation with Fix+ (CBM2700) and Fix- (CBM2707) C. taiwanensis.
Data for nodules harvested at 21 dpi
Plant	Nodule	Fix+ bacteria per nodule	Fix- bacteria per nodule
1	1	20000000
1	2	1.95736e+07
1	3		4.73373e+06
1	4	8.48126e+06
1	5		1.97239e+06
1	6		2200000
1	7		2.24806e+06
1	8		680473
1	9		1.35659e+07
1	10	5.22222e+06
1	11		3850000
1	12	9.10853e+06
1	13	949612
1	14		2400000
2	1		1490000
2	2		1310000
2	3	6.97674e+07
2	4		433925
2	5	5.22682e+07
2	6		3100000
2	7		1.61078e+06
2	8	1.29845e+07
2	9		1.61078e+07
3	1		1.51163e+06
3	2	1.60853e+07
3	3		6.1144e+06
3	4		6.78295e+06
3	5	1.08527e+07
3	6		3.55556e+06
3	7	1.57791e+06
4	1	3.11111e+06	610000	co-infected nodule
4	2	14250000
4	3		5.32544e+06
4	4	14250000
5	1	3.5503e+07
5	2	7.36434e+07
5	3		7.36434e+06
5	4		2.0155e+07
6	1	3.94444e+07
6	2	3.83333e+07
6	3		1.55039e+06
6	4	1.08527e+07
6	5		28000
6	6		1.77515e+06
6	7		162791
6	8		611440
6	9	1.14341e+07
7	1	3.84615e+06
7	2		8.33333e+06
7	3	6.58915e+06
7	4		22500000
7	5	6.00775e+06	5.52268e+06	co-infected nodule
7	6	405000
7	7		37000000
7	8		1.87984e+06
7	9		3850000
8	1	1.02713e+07
8	2		3.74753e+06
8	3	2.44444e+07
8	4	4.93097e+07
8	5		11600000
8	6		3.05556e+06
8	7	1.68605e+07
8	8		1.80802e+06
9	1	7.79093e+07
9	2	6.97674e+07
9	3	25000000
9	4		1000000
9	5	4.61111e+06
9	6	1.55039e+06
9	7		2.13178e+06
10	1	5.42406e+07
10	2	6.21302e+06
10	3	1.49225e+07
10	4	5.94444e+06
10	5		3.45168e+06
10	6		6.50888e+06
10	7		3.72222e+06
10	8		2.38889e+06
11	1		2650000
11	2		94000
		Fix+	Fix-
Total number of singly-infected nodules		38	42
Percentage of nodules		46.9136	51.8519

## Sheet: 28dpi
Figure 1A-Figure 3-Source Data 1. Reproductive fitness of nodule bacteria following co-inoculation with Fix+ (CBM2700) and Fix- (CBM2707) C. taiwanensis.
Data for nodules harvested at 28 dpi
Plant	Nodule	Fix+ bacteria per nodule	Fix- bacteria per nodule
1	1		102000
1	2	4.53649e+07
1	3		700000
1	4	8.77712e+07
1	5	5.71992e+06	870000
1	6	3.22222e+07
1	7	4.16667e+06
1	8		1130
2	1	7.75194e+07
2	2		1600000
2	3	7.75194e+07
2	4	3.61111e+07
2	5		460000
2	6	2.94444e+06
2	7		1430000
2	8		1800000
2	9	9500000
2	10	9500000
2	11		238889
2	12		1.00775e+06
2	13	3.55556e+07
2	14	7.59369e+06
3	1		160
3	2	7.10059e+07
3	3		3.45168e+06
3	4		1.01085e+06
3	5		1.01085e+06
3	6	2.03813e+07
3	7	25000000
3	8		2.38372e+07
3	9		4e+06
4	1		500000
4	2	5250000
4	3	4.93097e+06
4	4	8.43023e+07
4	5	8.43023e+07
4	6	4.45736e+07
4	7	4.45736e+07
4	8	1.37597e+08
4	9		1200000
4	10	425000
4	11	30000000
5	1		280000
5	2	9.10853e+07
5	3	1.86047e+08
5	4	7.94574e+07
5	5		405000
5	6	7.49507e+07
6	1	2.03488e+08
6	2		350000
6	3	8.1854e+07
6	4		1.12403e+06
6	5	3.61111e+06	2.46548e+06
6	6	1.62791e+07
6	7		1300000
6	8		1.08527e+06
6	9	1.78295e+07
6	10	26500000
6	11		483235
7	1	25000000	1.28205e+06
7	2	6.41026e+07
7	3	1.18217e+07
7	4		980000
7	5	3.44444e+07
7	6		250000
7	7		3.0814e+06
8	1	9.68992e+07
8	2	1.87984e+08
8	3	4.38889e+07
8	4	1.41473e+07
8	5	2.16963e+07
8	6		1.33721e+06
8	7		2600000
8	8		7.94574e+06
8	9		1.41473e+06
9	1	3.94444e+07
9	2	1.06589e+08
9	3	3.33333e+07
9	4	40000000
9	5		2.6956e+06
9	6		1.47287e+06
9	7		2.00526e+06
9	8		1710000
9	9		4.24063e+06
9	10		4.24063e+06
10	1	35500000
10	2		720000
10	3	5.32544e+07
10	4		1500000
10	5		1.29845e+07
10	6		5.91716e+06
10	7		1.45349e+07
10	8		3.77778e+06
10	9		3.69822e+06
10	10		3.69822e+06
10	11		581395
10	12		1.31783e+06
10	13		6.80473e+06
10	14		871137
10	15		871137
10	16		840000
10	17	1.36111e+07
10	18	1.36111e+07
10	19	7400000
10	20		11200000
10	21	7800000
10	22	13600000
11	1		325000
11	2		325000
11	3	490000
11	4	3.5503e+07
11	5		3300000
11	6	2.65504e+07
11	7	2.94444e+07
11	8	2.5641e+07
11	9		38000
12	1	25600000
12	2	2.33399e+07
12	3	1.06509e+07
12	4	8600000
12	5		1.16279e+07
12	6		8.6785e+06
12	7		940000
12	8		3.38889e+06
12	9		2.30112e+06
		Fix+	Fix-
Total number of singly-infected nodules		61	61
Percentage of nodules		48.8	48.8

## Sheet: 35dpi
Figure 1A-Figure 3-Source Data 1. Reproductive fitness of nodule bacteria following co-inoculation with Fix+ (CBM2700) and Fix- (CBM2707) C. taiwanensis.
Data for nodules harvested at 35 dpi
Plant	Nodule	Fix+ bacteria per nodule	Fix- bacteria per nodule
1	1		4.73373e+06
1	2	1.41473e+08
1	3		4100000
1	4		1.00775e+06
1	5		852713
1	6	6.90335e+07
1	7	1.72481e+07
1	8	26500000
1	9	9.49612e+07
1	10	7.19921e+07	900000	co-infected nodule
1	11	3.05556e+07
1	12	5.12821e+07
1	13	6.97674e+07
2	1	1.35659e+08
2	2	5.91085e+07
2	3		1.53101e+06
2	4		4.53649e+06
2	5		949612
3	1	24500000
3	2	3.94477e+07
3	3	3.94477e+07
3	4	21900000
3	5	1.89922e+07
3	6	1.29845e+08
3	7	4.14201e+07
3	8	4.05556e+07
3	9	6.21302e+07
3	10	7.55814e+07
3	11		1.53101e+06
3	12		1.14341e+06
3	13	4000	678295	co-infected nodule
3	14	3.11111e+07
4	1		2.77778e+06
4	2	4.83235e+07	6600000	co-infected nodule
4	3		3.33333e+06
4	4		6.50888e+06
4	5	8.13953e+07
5	1	6.80473e+06
5	2		2100000
5	3		680473
5	4	19000000
5	5	4.04339e+07
5	6	5.91716e+07
5	7	4.24063e+07
6	1		4.14201e+06
6	2	1.20155e+08
6	3	5.42406e+07	5400000	co-infected nodule
6	4	6.97674e+07
6	5	4.43787e+07
6	6		1010000
6	7		1.16279e+06
7	1		1.04651e+07
7	2	1.55039e+08
7	3	4.84496e+07	4600000	co-infected nodule
7	4	1.04651e+08
7	5	3.61111e+07	2.95858e+07	co-infected nodule
7	6		23000000
7	7		8.72093e+06
7	8		2.38889e+06
8	1		1030000
8	2		2.00526e+06
8	3	4.14201e+07
8	4	1.41473e+07
8	5		305000
8	6	8.33333e+07
8	7	6.80473e+07
8	8	2.61111e+07
8	9		2900000
8	10	6.58915e+07
9	1	5.91085e+07
9	2	5.91085e+07
9	3	9.49612e+07
9	4	7.36434e+07
9	5	3.94444e+07
9	6		2.27778e+06
9	7		872093
9	8	21500000
9	9	3.05556e+07
9	10	5.22682e+06
9	11	1160000
9	12		2.27778e+07
10	1		720000
10	2		1.00775e+06
10	3	3.33333e+07
10	4		4.33333e+06
10	5		5.71992e+06
10	6		4.43787e+06
10	7	6.70611e+07
10	8	1.20155e+07
10	9	2.5e+07
10	10	3.44444e+07
11	1		73
11	2	6.21302e+06
11	3	8.91473e+06
11	4		1.08527e+06
11	5		1.5286e+06
11	6		1.5286e+06
11	7		800000
12	1	11500000
12	2		532544
12	3		325000
12	4		1.27907e+06
12	5		473373
12	6	9100000
12	7	1.08481e+06
12	8		1120000
12	9		1720000
12	10	9700000
12	11		330000
12	12	2.16667e+06
12	13	5.22682e+06
12	14	5.74074e+06
12	15		1000000
12	16	5.74074e+06
12	17	5.74074e+06
12	18	1.28205e+07
12	19		8600000
12	20	1.28205e+07
12	21	7300000
12	22	5.6213e+07
12	23	4.63511e+07
		Fix+	Fix-
Total number of singly-infected nodules		68	47
Percentage of nodules		56.1983	38.843

## Sheet: 42dpi
Figure 1A-Figure 3-Source Data 1. Reproductive fitness of nodule bacteria following co-inoculation with Fix+ (CBM2700) and Fix- (CBM2707) C. taiwanensis.
Data for nodules harvested at 42 dpi
Plant	Nodule	Fix+ bacteria per nodule	Fix- bacteria per nodule
1	1	580
1	2	1.60853e+07
1	3		6.29845e+06
1	4		6.29845e+06
1	5	7.55814e+07
1	6		3.72222e+06
1	7		1.27907e+06
1	8	1.64729e+07
1	9		2.72222e+06
1	10	175000000
2	1	7.69231e+07
2	2		38759.7
2	3	1.66667e+08
2	4		760000
2	5	1.18217e+08
2	6		4100000
2	7		4100000
2	8	1900000
2	9	4.14201e+07
2	10	3.81008e+07
2	11		1.90746e+06
2	12	1200
2	13		1.84109e+07
2	14		2.61111e+06
2	15		404339
2	16	6.50888e+07
2	17	8.52713e+07
2	18	5.6213e+07
3	1	7.36434e+07
3	2	7.36434e+07
3	3	6.31164e+07
3	4	7.75194e+07
3	5		38759.7
3	6	1.49225e+08
3	7	562130
3	8		2.07101e+06
3	9		2.07101e+06
3	10	7.94574e+07
4	1	8.52713e+07
4	2		1400000
4	3	9.49612e+07
4	4		453649
4	5	9.10853e+07
4	6	1.33721e+08
4	7		500000
4	8		5.22682e+06
4	9		38759.7
4	10		890000
4	11		890000
4	12	6.39535e+07
4	13		400000
4	14	5.1192e+07
4	15		1700000
4	16		129199
4	17		129199
4	18		129199
5	1	9.88372e+07
5	2		38759.7
5	3		11900000
5	4	2.59698e+07
5	5	2.59698e+07
5	6	2.59698e+07
5	7		2.33333e+06
5	8	2.44444e+06	3.84615e+06	co-infected nodule
5	9	7.59369e+07	1010000	co-infected nodule
5	10	7.97035e+07
5	11		2030000
5	12	1.04651e+08
5	13		1.14815e+06
5	14		1.14815e+06
5	15		1.14815e+06
5	16		19379.8
5	17		19379.8
5	18		930000
6	1	5.6213e+07
6	2	1.05556e+07
6	3	1.05556e+07
6	4	4.33925e+07
6	5		38759.7
6	6		1390000
6	7	8.91473e+07
6	8	25000000
6	9		1e+06
6	10		1e+06
6	11	1.35659e+08
6	12	4.53649e+06
6	13	7.94574e+07
6	14		1.77515e+06
6	15	4.89095e+07
6	16		990000
6	17	1.3614e+07
6	18		5.84444e+06
6	19		5.84444e+06
7	1	2.41667e+08
7	2	2.41667e+08
7	3		4.14201e+06
7	4	6.1144e+07
7	5	3.16667e+07
7	6	1.27907e+09
7	7		1.7e+07
7	8	2.44444e+08
7	9	1.35972e+08
7	10		2.50131e+06
7	11		2.50131e+06
7	12		3.05556e+06
7	13		777778
7	14		777778
7	15		777778
7	16		777778
		Fix+	Fix-
Total number of singly-infected nodules		54	54
Percentage of nodules		49.5413	49.5413

## Sheet: 49dpi
Figure 1A-Figure 3-Source Data 1. Reproductive fitness of nodule bacteria following co-inoculation with Fix+ (CBM2700) and Fix- (CBM2707) C. taiwanensis.
Data for nodules harvested at 49 dpi
Plant	Nodule	Fix+ bacteria per nodule	Fix- bacteria per nodule
1	1	8.38264e+07
1	2		552326
1	3		552326
1	4		1.3478e+06
1	5		690335
1	6	5800000	1500000	co-infected nodule
1	7		5.02959e+06
1	8		5.12821e+06
1	9	18100000
1	10	17800000
1	11		2500000
1	12	2.03813e+07
1	13	3.72222e+07
1	14		100000
1	15		532544
1	16		163000
2	1	4.19132e+07
2	2	4.19132e+07
2	3	7.19921e+07	1900000	co-infected nodule
2	4		680000
2	5	4.11111e+07
2	6		2200000
2	7		2200000
2	8		2200000
2	9		390000
2	10	15200000
2	11		805391
2	12		805391
2	13	1.10465e+07
2	14		2.66272e+06
2	15		2.66272e+06
2	16		535000
2	17		535000
3	1		1.14341e+06
3	2		2.16963e+06
3	3	500000
3	4	6900000
3	5		621302
3	6	9800000
3	7		5700000
3	8		4.88889e+06
3	9		2840000
4	1	5800000
4	2	5.88889e+07
4	3	1.16371e+08
4	4	32200000
4	5	32800000
4	6	39200000
4	7	3.95349e+07
4	8		3.02433e+06
4	9	6.77778e+07
4	10		1340000
4	11	9e+07
5	1	1.02e+08
5	2	1.02e+08
5	3	10200000
5	4	10200000
5	5	42400000
5	6		20000
5	7	3.81328e+07
5	8	3.28731e+07
5	9	1.38067e+07
5	10		4.83235e+06
5	11		4.83235e+06
5	12	70000000
5	13	2600000	1960000	co-infected nodule
5	14		860000
6	1		733333
6	2		4.73373e+06
6	3	41000000
6	4	85000000
6	5	85000000
6	6	10100000
6	7	10100000
6	8	22000000
6	9	2.83333e+07
6	10	2.16963e+06	5.91716e+06	co-infected nodule
7	1	2950000	361111	co-infected nodule
7	2		5.71992e+06
7	3	4.74806e+07
7	4	4.74806e+07
7	5	3000
7	6		680473
7	7	4.74806e+07
7	8	4.74806e+07
7	9		641026
7	10	8.38264e+07
7	11	9000
7	12	23700000
7	13		4.66667e+06
7	14		370000
7	15	1.89922e+07
7	16	1.89922e+07
7	17		2.26824e+06
7	18		2.26824e+06
8	1	5.71992e+07
8	2	7.00197e+07	2700000	co-infected nodule
8	3	9.68992e+07
8	4		1550000
8	5		1550000
8	6	26500000
8	7		1.74227e+06
8	8		1.56977e+06
8	9	2.95858e+07
8	10	2.95858e+07
8	11	1.20155e+08	600000	co-infected nodule
9	1		770000
9	2		370000
9	3		2.22222e+06
9	4	11000000
9	5	6.50888e+07
9	6	6.50888e+06
9	7		100000
9	8	4.63511e+07
9	9		6900000
9	10	5.23256e+07
9	11	5.23256e+07
10	1	9.1716e+07
10	2	2.17054e+07
10	3		40000
10	4	4.22222e+07
10	5	3.99408e+07
10	6	3.99408e+07
10	7		5900000
10	8		5900000
10	9	4.77778e+07	3500000	co-infected nodule
10	10	8.87574e+06
10	11	1.78295e+07
10	12		740000
	Total nodules	129
		Fix+	Fix-
Total number of singly-infected nodules		66	55
Percentage of nodules		51.1628	42.6357

## Sheet: statistics
Statistics for Figure 1A
Multiple comparison test of number of bacteria per nodule after Kruskal-Wallis
p.value: 0.05
Comparisons of the number of bacteria per nodule	obs.dif	critical.dif	difference
14 dpi Fix+ / 14 dpi Fix-	1.87817	171.91	FALSE
14 dpi Fix+ / 21 dpi Fix+	82.2902	162.793	FALSE
14 dpi Fix+ / 21 dpi Fix-	62.0783	158.149	FALSE
14 dpi Fix+ / 28 dpi Fix+	150.166	150.829	FALSE
14 dpi Fix+ / 28 dpi Fix-	117.933	150.829	FALSE
14 dpi Fix+ / 35 dpi Fix+	156.872	148.974	TRUE
14 dpi Fix+ / 35 dpi Fix-	104.42	156.073	FALSE
14 dpi Fix+ / 42 dpi Fix+	196.469	153.898	TRUE
14 dpi Fix+ / 42 dpi Fix-	128.528	152.77	FALSE
14 dpi Fix+ / 49 dpi Fix+	150.67	149.466	TRUE
14 dpi Fix+ / 49 dpi Fix-	127.01	152.77	FALSE
14 dpi Fix- / 21 dpi Fix+	80.412	146.157	FALSE
14 dpi Fix- / 21 dpi Fix-	63.9565	140.966	FALSE
14 dpi Fix- / 28 dpi Fix+	148.287	132.702	TRUE
14 dpi Fix- / 28 dpi Fix-	119.811	132.702	FALSE
14 dpi Fix- / 35 dpi Fix+	154.994	130.589	TRUE
14 dpi Fix- / 35 dpi Fix-	106.299	138.633	FALSE
14 dpi Fix- / 42 dpi Fix+	194.59	136.179	TRUE
14 dpi Fix- / 42 dpi Fix-	130.406	134.904	FALSE
14 dpi Fix- / 49 dpi Fix+	148.792	131.15	TRUE
14 dpi Fix- / 49 dpi Fix-	128.888	134.904	FALSE
21 dpi Fix+ / 21 dpi Fix-	144.369	129.691	TRUE
21 dpi Fix+ / 28 dpi Fix+	67.8755	120.657	FALSE
21 dpi Fix+ / 28 dpi Fix-	200.223	120.657	TRUE
21 dpi Fix+ / 35 dpi Fix+	74.5817	118.329	FALSE
21 dpi Fix+ / 35 dpi Fix-	186.711	127.151	TRUE
21 dpi Fix+ / 42 dpi Fix+	114.178	124.472	FALSE
21 dpi Fix+ / 42 dpi Fix-	210.818	123.075	TRUE
21 dpi Fix+ / 49 dpi Fix+	68.3801	118.948	FALSE
21 dpi Fix+ / 49 dpi Fix-	209.3	123.075	TRUE
21 dpi Fix- / 28 dpi Fix+	212.244	114.314	TRUE
21 dpi Fix- / 28 dpi Fix-	55.8544	114.314	FALSE
21 dpi Fix- / 35 dpi Fix+	218.95	111.855	TRUE
21 dpi Fix- / 35 dpi Fix-	42.3422	121.149	FALSE
21 dpi Fix- / 42 dpi Fix+	258.547	118.333	TRUE
21 dpi Fix- / 42 dpi Fix-	66.4499	116.864	FALSE
21 dpi Fix- / 49 dpi Fix+	212.749	112.509	TRUE
21 dpi Fix- / 49 dpi Fix-	64.9317	116.864	FALSE
28 dpi Fix+ / 28 dpi Fix-	268.098	103.952	TRUE
28 dpi Fix+ / 35 dpi Fix+	6.70624	101.241	FALSE
28 dpi Fix+ / 35 dpi Fix-	254.586	111.424	TRUE
28 dpi Fix+ / 42 dpi Fix+	46.303	108.356	FALSE
28 dpi Fix+ / 42 dpi Fix-	278.694	106.749	TRUE
28 dpi Fix+ / 49 dpi Fix+	0.504595	101.964	FALSE
28 dpi Fix+ / 49 dpi Fix-	277.176	106.749	TRUE
28 dpi Fix- / 35 dpi Fix+	274.805	101.241	TRUE
28 dpi Fix- / 35 dpi Fix-	13.5122	111.424	FALSE
28 dpi Fix- / 42 dpi Fix+	314.401	108.356	TRUE
28 dpi Fix- / 42 dpi Fix-	10.5955	106.749	FALSE
28 dpi Fix- / 49 dpi Fix+	268.603	101.964	TRUE
28 dpi Fix- / 49 dpi Fix-	9.07735	106.749	FALSE
35 dpi Fix+ / 35 dpi Fix-	261.292	108.9	TRUE
35 dpi Fix+ / 42 dpi Fix+	39.5967	105.759	FALSE
35 dpi Fix+ / 42 dpi Fix-	285.4	104.111	TRUE
35 dpi Fix+ / 49 dpi Fix+	6.20165	99.199	FALSE
35 dpi Fix+ / 49 dpi Fix-	283.882	104.111	TRUE
35 dpi Fix- / 42 dpi Fix+	300.889	115.544	TRUE
35 dpi Fix- / 42 dpi Fix-	24.1077	114.038	FALSE
35 dpi Fix- / 49 dpi Fix+	255.091	109.572	TRUE
35 dpi Fix- / 49 dpi Fix-	22.5896	114.038	FALSE
42 dpi Fix+ / 42 dpi Fix-	324.997	111.043	TRUE
42 dpi Fix+ / 49 dpi Fix+	45.7984	106.451	FALSE
42 dpi Fix+ / 49 dpi Fix-	323.479	111.043	TRUE
42 dpi Fix- / 49 dpi Fix+	279.198	104.814	TRUE
42 dpi Fix- / 49 dpi Fix-	1.51818	109.475	FALSE
49 dpi Fix+ / 49 dpi Fix-	277.68	104.814	TRUE
Statistics for Figure 3
Student t-test (paired data) for each time point - number of nodules formed by Fix+ and Fix- bacteria per plant
14 dpi	p-value = 0.372854792699897
21 dpi	p-value = 0.240039652818022
28 dpi	p-value = 1
35 dpi	p-value = 0.131488582311785
42 dpi	p-value = 0.771712333952407
49 dpi	p-value = 0.452842493287371
Multiple comparison test of the number of nodules formed by Fix+ and Fix- strains after Kruskal-Wallis
p.value: 0.05
Comparisons of nodule number	obs.dif	critical.dif	difference
14 dpi Fix+ / 14 dpi Fix-	12.25	54.1306	FALSE
14 dpi Fix+ / 21 dpi Fix+	18.4955	52.886	FALSE
14 dpi Fix+ / 21 dpi Fix-	26.7227	52.886	FALSE
14 dpi Fix+ / 28 dpi Fix+	45.8667	51.8261	FALSE
14 dpi Fix+ / 28 dpi Fix-	40.2417	51.8261	FALSE
14 dpi Fix+ / 35 dpi Fix+	45.8667	51.8261	FALSE
14 dpi Fix+ / 35 dpi Fix-	31.4917	51.8261	FALSE
14 dpi Fix+ / 42 dpi Fix+	74.3071	59.649	TRUE
14 dpi Fix+ / 42 dpi Fix-	70.5929	59.649	TRUE
14 dpi Fix+ / 49 dpi Fix+	70.1	54.1306	TRUE
14 dpi Fix+ / 49 dpi Fix-	53.3	54.1306	FALSE
14 dpi Fix- / 21 dpi Fix+	6.24545	52.886	FALSE
14 dpi Fix- / 21 dpi Fix-	14.4727	52.886	FALSE
14 dpi Fix- / 28 dpi Fix+	33.6167	51.8261	FALSE
14 dpi Fix- / 28 dpi Fix-	27.9917	51.8261	FALSE
14 dpi Fix- / 35 dpi Fix+	33.6167	51.8261	FALSE
14 dpi Fix- / 35 dpi Fix-	19.2417	51.8261	FALSE
14 dpi Fix- / 42 dpi Fix+	62.0571	59.649	TRUE
14 dpi Fix- / 42 dpi Fix-	58.3429	59.649	FALSE
14 dpi Fix- / 49 dpi Fix+	57.85	54.1306	TRUE
14 dpi Fix- / 49 dpi Fix-	41.05	54.1306	FALSE
21 dpi Fix+ / 21 dpi Fix-	8.22727	51.6115	FALSE
21 dpi Fix+ / 28 dpi Fix+	27.3712	50.5248	FALSE
21 dpi Fix+ / 28 dpi Fix-	21.7462	50.5248	FALSE
21 dpi Fix+ / 35 dpi Fix+	27.3712	50.5248	FALSE
21 dpi Fix+ / 35 dpi Fix-	12.9962	50.5248	FALSE
21 dpi Fix+ / 42 dpi Fix+	55.8117	58.5219	FALSE
21 dpi Fix+ / 42 dpi Fix-	52.0974	58.5219	FALSE
21 dpi Fix+ / 49 dpi Fix+	51.6045	52.886	FALSE
21 dpi Fix+ / 49 dpi Fix-	34.8045	52.886	FALSE
21 dpi Fix- / 28 dpi Fix+	19.1439	50.5248	FALSE
21 dpi Fix- / 28 dpi Fix-	13.5189	50.5248	FALSE
21 dpi Fix- / 35 dpi Fix+	19.1439	50.5248	FALSE
21 dpi Fix- / 35 dpi Fix-	4.76894	50.5248	FALSE
21 dpi Fix- / 42 dpi Fix+	47.5844	58.5219	FALSE
21 dpi Fix- / 42 dpi Fix-	43.8701	58.5219	FALSE
21 dpi Fix- / 49 dpi Fix+	43.3773	52.886	FALSE
21 dpi Fix- / 49 dpi Fix-	26.5773	52.886	FALSE
28 dpi Fix+ / 28 dpi Fix-	5.625	49.4142	FALSE
28 dpi Fix+ / 35 dpi Fix+	0	49.4142	FALSE
28 dpi Fix+ / 35 dpi Fix-	14.375	49.4142	FALSE
28 dpi Fix+ / 42 dpi Fix+	28.4405	57.5658	FALSE
28 dpi Fix+ / 42 dpi Fix-	24.7262	57.5658	FALSE
28 dpi Fix+ / 49 dpi Fix+	24.2333	51.8261	FALSE
28 dpi Fix+ / 49 dpi Fix-	7.43333	51.8261	FALSE
28 dpi Fix- / 35 dpi Fix+	5.625	49.4142	FALSE
28 dpi Fix- / 35 dpi Fix-	8.75	49.4142	FALSE
28 dpi Fix- / 42 dpi Fix+	34.0655	57.5658	FALSE
28 dpi Fix- / 42 dpi Fix-	30.3512	57.5658	FALSE
28 dpi Fix- / 49 dpi Fix+	29.8583	51.8261	FALSE
28 dpi Fix- / 49 dpi Fix-	13.0583	51.8261	FALSE
35 dpi Fix+ / 35 dpi Fix-	14.375	49.4142	FALSE
35 dpi Fix+ / 42 dpi Fix+	28.4405	57.5658	FALSE
35 dpi Fix+ / 42 dpi Fix-	24.7262	57.5658	FALSE
35 dpi Fix+ / 49 dpi Fix+	24.2333	51.8261	FALSE
35 dpi Fix+ / 49 dpi Fix-	7.43333	51.8261	FALSE
35 dpi Fix- / 42 dpi Fix+	42.8155	57.5658	FALSE
35 dpi Fix- / 42 dpi Fix-	39.1012	57.5658	FALSE
35 dpi Fix- / 49 dpi Fix+	38.6083	51.8261	FALSE
35 dpi Fix- / 49 dpi Fix-	21.8083	51.8261	FALSE
42 dpi Fix+ / 42 dpi Fix-	3.71429	64.6984	FALSE
42 dpi Fix+ / 49 dpi Fix+	4.20714	59.649	FALSE
42 dpi Fix+ / 49 dpi Fix-	21.0071	59.649	FALSE
42 dpi Fix- / 49 dpi Fix+	0.492857	59.649	FALSE
42 dpi Fix- / 49 dpi Fix-	17.2929	59.649	FALSE
49 dpi Fix+ / 49 dpi Fix-	16.8	54.1306	FALSE
