# Supplementary material for: Spatio-temporal control of mutualism in legumes helps spread symbiotic nitrogen fixation
Source: eLife. 2017 Oct 12;6:e28683. doi: 10.7554/eLife.28683 (PMC5687860; doi:10.7554/eLife.28683)
Supplement: Figure 2—source data 2. [file elife-28683-fig2-data2.xlsx]

## Sheet: Feuil1
Figure 2BC-Source Data 4. Simulation data for the reproductive fitness of Fix+ and Fix- bacteria following single inoculations of M. pudica.
Simulations were run for 1 cycle of 49 days on 200 individual plants, starting either with Fix+ or Fix- inoculum
The average number of bacteria per plant is indicated for each day
	Day 1	Day 2	Day 3	Day 4	Day 5	Day 6	Day 7	Day 8	Day 9	Day 10	Day 11	Day 12	Day 13	Day 14	Day 15	Day 16	Day 17	Day 18	Day 19	Day 20	Day 21	Day 22	Day 23	Day 24	Day 25	Day 26	Day 27	Day 28	Day 29	Day 30	Day 31	Day 32	Day 33	Day 34	Day 35	Day 36	Day 37	Day 38	Day 39	Day 40	Day 41	Day 42	Day 43	Day 44	Day 45	Day 46	Day 47	Day 48	Day 49
Fix+	1.55902	7.43018	29.8883	115.285	439.474	1672.43	6360.12	24180.9	91882	348414	1.31098e+06	4.79261e+06	1.58294e+07	3.93349e+07	6.7014e+07	9.48951e+07	1.20821e+08	1.43245e+08	1.65035e+08	1.85956e+08	2.08208e+08	2.32427e+08	2.5535e+08	2.76226e+08	2.95083e+08	3.12919e+08	3.2838e+08	3.41802e+08	3.53456e+08	3.65256e+08	3.77906e+08	3.89671e+08	4.0177e+08	4.13525e+08	4.23693e+08	4.31982e+08	4.40064e+08	4.48405e+08	4.5505e+08	4.60822e+08	4.66021e+08	4.70893e+08	4.74933e+08	4.78327e+08	4.81488e+08	4.84657e+08	4.8774e+08	4.90126e+08	4.91843e+08
Fix-	1.8252	8.80355	35.1106	134.725	514.133	1956.5	7440.78	28289.5	107493	407607	1.53365e+06	5.60578e+06	1.85033e+07	4.58308e+07	7.68449e+07	1.05034e+08	1.00447e+08	9.63397e+07	9.50801e+07	9.97687e+07	9.27467e+07	9.03879e+07	8.92741e+07	9.01059e+07	9.33264e+07	9.05219e+07	9.05218e+07	8.83176e+07	8.85205e+07	8.91782e+07	9.0259e+07	9.03343e+07	8.61582e+07	8.66564e+07	7.78604e+07	7.54773e+07	7.25372e+07	6.99269e+07	6.73973e+07	6.34258e+07	6.1543e+07	6.30134e+07	6.30621e+07	6.09863e+07	5.7901e+07	5.82104e+07	5.60456e+07	5.50213e+07	5.31289e+07
