# Supplementary material for: Spatio-temporal control of mutualism in legumes helps spread symbiotic nitrogen fixation
Source: eLife. 2017 Oct 12;6:e28683. doi: 10.7554/eLife.28683 (PMC5687860; doi:10.7554/eLife.28683)
Supplement: Figure 4—source data 1. [file elife-28683-fig4-data1.xlsx]

## Sheet: Feuil1
Figure 4-Source Data 5. Nodulation kinetics of Fix+ (CBM382) and Fix- (CBM2568) C. taiwanensis following single- or co-inoculation of M. pudica.
Results are from one experiment. 20 Plants were analysed for each strain.
Each tube contained two M. pudica plants.
		dpi
Strain	Tube	7	8	9	10	11	14	15	16	17	18	21	22	23	24	25	30	31	32	35	36	37	38	39
CBM832	1	9	10	12	13	13	13	13	13	13	13	13	13	13	13	13	13	13	13	13	13	13	13	13
	2	10	11	11	11	11	14	16	16	16	16	16	16	16	17	17	17	17	17	18	18	18	18	18
	3	10	12	12	14	14	14	14	14	14	15	15	15	16	16	16	16	16	16	16	16	16	16	16
	4	6	11	12	13	13	14	14	15	16	17	19	19	20	20	20	20	20	20	20	20	20	20	20
	5	11	12	13	13	13	14	14	14	14	14	14	14	14	14	14	14	14	14	14	14	14	14	14
	6	9	11	11	11	11	11	11	11	11	11	11	11	11	12	12	12	12	12	12	12	12	12	12
	7	8	8	11	11	12	16	16	16	16	17	18	18	18	18	18	18	18	18	18	18	18	18	18
	8	14	16	16	18	18	18	18	18	18	19	20	20	20	20	20	21	21	21	21	21	21	21	21
	9	7	9	9	9	9	14	14	14	14	14	15	16	18	18	18	18	18	18	18	18	18	18	18
	10	10	13	15	15	15	15	15	16	16	16	16	16	18	18	18	18	18	18	18	18	18	18	18
Mean number of nodules per plant	Fix+	4.7	5.65	6.1	6.4	6.45	7.15	7.25	7.35	7.4	7.6	7.85	7.9	8.2	8.3	8.3	8.35	8.35	8.35	8.4	8.4	8.4	8.4	8.4
CBM2568	1	6	7	9	9	9	11	15	17	17	18	23	24	27	27	31	33	34	35	37	39	40	40	44
	2	15	15	16	17	17	23	30	30	31	33	40	40	43	43	44	45	52	56	58	61	63	63	63
	3	8	9	9	10	10	16	21	22	25	26	29	33	33	35	36	44	44	44	46	48	50	50	51
	4	12	13	13	13	13	39	44	44	44	45	50	54	60	61	61	67	67	70	70	71	75	77	79
	5	6	10	10	11	11	19	24	26	31	31	31	32	39	43	43	43	43	43	46	47	47	47	49
	6	8	12	13	13	13	21	24	24	24	27	33	40	40	40	40	40	40	40	40	41	42	44	47
	7	13	19	21	21	21	31	31	31	34	38	43	45	46	46	46	53	56	58	62	64	65	67	68
	8	10	10	11	13	13	20	22	23	35	40	40	40	42	44	45	46	50	53	53	53	53	56	62
	9	5	5	8	11	11	26	30	30	30	30	31	35	35	35	35	40	46	47	48	52	52	55	61
	10	12	13	13	13	14	22	25	30	30	30	35	40	40	40	40	40	41	43	43	45	46	48	48
Mean number of nodules per plant	Fix-	4.75	5.65	6.15	6.55	6.6	11.4	13.3	13.85	15.05	15.9	17.75	19.15	20.25	20.7	21.05	22.55	23.65	24.45	25.15	26.05	26.65	27.35	28.6
CBM832/CBM2568 (1/1)	1	14	15	18	18	18	25	29	34	34	34	34	34	34	34	35	35	35	35	35	35	35	35	35
	2	12	15	15	17	22	33	33	33	33	33	36	39	39	41	41	41	41	41	41	41	41	41	42
	3	10	11	11	15	15	15	19	19	19	23	26	27	27	27	27	27	28	28	32	32	32	32	32
	4	10	10	12	13	16	16	18	18	19	21	21	21	21	21	21	21	21	21	21	21	21	22	23
	5	10	11	11	13	14	16	17	17	23	26	28	30	30	30	30	30	30	30	30	30	30	30	30
	6	10	12	12	13	15	18	19	21	21	22	22	22	22	22	22	23	23	23	23	23	23	23	23
	7	7	12	15	15	15	21	24	24	24	24	25	25	25	25	25	25	25	25	25	25	25	26	26
	8	13	14	15	15	15	19	19	19	20	20	21	22	22	22	22	23	23	23	24	24	24	24	24
	9	7	8	14	15	17	17	19	20	20	21	23	26	26	27	27	27	27	27	27	27	27	27	27
	10	11	11	14	14	14	14	15	15	15	15	17	17	17	17	17	17	17	17	17	17	17	17	17
Mean number of nodules per plant	1/1	5.2	5.95	6.85	7.4	8.05	9.7	10.6	11	11.4	11.95	12.65	13.15	13.15	13.3	13.35	13.45	13.5	13.5	13.75	13.75	13.75	13.85	13.95
CBM832/CBM2568 (1/99)	1	7	11	14	14	15	15	18	20	20	23	26	26	27	31	31	31	34	35	39	39	42	44	46
	2	7	8	8	11	12	19	26	27	28	31	38	38	38	44	44	44	52	53	56	60	61	62	66
	3	7	7	7	7	7	16	18	18	18	18	22	22	24	24	24	26	27	28	34	35	36	38	38
	4	7	7	7	8	11	23	23	27	27	30	33	35	35	35	35	36	37	37	40	42	43	45	48
	5	12	13	13	13	15	29	29	31	31	31	31	34	38	40	40	43	45	48	50	51	53	54	54
	6	10	11	11	11	11	22	28	28	28	31	31	37	37	38	38	40	45	45	45	47	49	55	55
	7	11	11	11	12	13	22	26	26	26	29	30	32	34	34	34	36	36	36	40	42	46	50	52
	8	9	9	9	11	13	21	21	21	21	24	31	32	33	33	36	40	40	43	46	46	47	52	53
	9	12	12	14	15	15	16	16	18	18	21	32	32	33	33	33	33	35	38	38	42	42	42	46
	10	11	14	15	16	16	30	30	30	30	30	38	38	38	39	39	44	45	47	51	52	52	52	52
Mean number of nodules per plant	1/99	4.65	5.15	5.45	5.9	6.4	10.65	11.75	12.3	12.35	13.4	15.6	16.3	16.85	17.55	17.7	18.65	19.8	20.5	21.95	22.8	23.55	24.7	25.5
