# Supplementary material for: Spatio-temporal control of mutualism in legumes helps spread symbiotic nitrogen fixation
Source: eLife. 2017 Oct 12;6:e28683. doi: 10.7554/eLife.28683 (PMC5687860; doi:10.7554/eLife.28683)
Supplement: Figure 7—source data 1. [file elife-28683-fig7-data1.xlsx]

## Sheet: data_ARA
Figure 7-Source Data 6. Nitrogenase activity.
Strain	Independent experiment no.	dpi	ppm C2H2/nodule/hour
CBM832	1	7	61.8911
CBM832	1	7	68.0819
CBM832	1	7	1.26756
CBM832	2	7	97.1
CBM832	2	7	13.5642
CBM832	2	7	56.9601
CBM832	2	7	29.6993
CBM832	2	7	22.0664
CBM832	2	7	1.26517
CBM832	1	8	589.181
CBM832	1	8	364.911
CBM832	1	8	155.83
CBM832	2	8	18.8672
CBM832	2	8	103.656
CBM832	2	8	55.4108
CBM832	2	8	31.2546
CBM832	2	8	74.0605
CBM832	2	8	59.7177
CBM832	2	8	44.8127
CBM832	1	9	200.502
CBM832	1	9	118.458
CBM832	1	9	38.9725
CBM832	2	9	29.9066
CBM832	2	9	11.4254
CBM832	2	9	172.744
CBM832	2	9	29.8505
CBM832	2	9	39.9045
CBM832	2	9	171.629
CBM832	2	9	93.8699
CBM832	1	10	162.294
CBM832	1	10	126.805
CBM832	1	10	139.43
CBM832	1	10	530.865
CBM832	2	10	250.22
CBM832	2	10	81.8428
CBM832	2	10	148.913
CBM832	2	10	198.841
CBM832	2	10	173.347
CBM832	2	10	166.397
CBM832	2	14	211.511
CBM832	2	14	320.035
CBM832	2	14	329.452
CBM832	2	14	227.597
CBM832	2	14	470.466
CBM832	2	14	127.873
CBM832	2	14	258.246
CBM832	2	14	212.373
CBM832	2	14	171.29
CBM832	2	21	317.418
CBM832	2	21	312.558
CBM832	2	21	198.254
CBM832	2	21	174.826
CBM832	2	21	318.874
CBM832	2	21	20.8104
CBM832	2	21	35.054
CBM832	2	21	174.265
CBM832	2	21	119.511
CBM832	2	21	87.219
CBM832	1	29	326.866
CBM832	1	29	617.344
CBM832	2	28	239.07
CBM832	2	28	761.218
CBM832	2	28	321.068
CBM832	2	28	192.667
CBM832	2	28	212.71
CBM832	2	28	135.795
CBM832	2	28	266.588
CBM832	2	28	492.774
CBM832	2	28	615.136
CBM832	2	28	551.477
CBM832	2	35	238.201
CBM832	2	35	325.904
CBM832	2	35	233.039
CBM832	2	35	184.578
CBM832	2	35	283.964
CBM832	2	35	149.296
CBM832	2	35	312.388
CBM832	2	35	207.188
CBM832	2	35	641.518
CBM832	2	35	377.981
CBM832	2	42	385.008
CBM832	2	42	455.871
CBM832	2	42	265.001
CBM832	2	42	1265.61
CBM832	2	42	187.107
CBM832	2	42	596.731
CBM832	2	42	379.493
CBM832	2	42	260.004
CBM832	2	42	247.174
CBM832	2	42	266.476
CBM2568	1	6	3.78954
CBM2568	1	6	3.16507
CBM2568	1	6	3.48191
CBM2568	1	7	5.32988
CBM2568	1	7	4.84881
CBM2568	1	7	4.91754
CBM2568	1	8	3.21201
CBM2568	1	8	4.09655
CBM2568	1	8	4.12802
CBM2568	1	9	4.51971
CBM2568	1	9	4.03426
Acetylene control	1	7	4.28376
Acetylene control	1	8	4.12556
Acetylene control	1	9	3.62021
Acetylene control	1	10	3.45297
Acetylene control	2	7	5.5679
Acetylene control	2	8	4.45388
Acetylene control	2	10	4.92787
Acetylene control	2	21	4.79847
Acetylene control	2	28	4.01815
Acetylene control	2	35	3.35375
Acetylene control	2	42	2.57496

## Sheet: statistics
Statistics for Figure 7
Multiple comparison test after Kruskal-Wallis			er Kruskal-Wallis
p.value: 0.05
Comparison	obs.dif	critical.dif	difference
Acetylene control/Fix/	0.0909091	45.9361	FALSE
Acetylene control/Fix+ 7 dpi	15.101	48.4209	FALSE
Acetylene control/Fix+ 8 dpi	39.1455	47.0705	FALSE
Acetylene control/Fix+ 9 dpi	31.3455	47.0705	FALSE
Acetylene control/Fix+ 10 dpi	50.4455	47.0705	TRUE
Acetylene control/Fix+ 14 dpi	65.101	48.4209	TRUE
Acetylene control/Fix+ 21 dpi	49.0455	47.0705	TRUE
Acetylene control/Fix+ 28 dpi	76.9621	44.9689	TRUE
Acetylene control/Fix+ 35 dpi	69.1455	47.0705	TRUE
Acetylene control/Fix+ 42 dpi	78.3455	47.0705	TRUE
Fix-/Fix+ 7 dpi	15.0101	48.4209	FALSE
Fix-/Fix+ 8 dpi	39.0545	47.0705	FALSE
Fix-/Fix+ 9 dpi	31.2545	47.0705	FALSE
Fix-/Fix+ 10 dpi	50.3545	47.0705	TRUE
Fix-/Fix+ 14 dpi	65.0101	48.4209	TRUE
Fix-/Fix+ 21 dpi	48.9545	47.0705	TRUE
Fix-/Fix+ 28 dpi	76.8712	44.9689	TRUE
Fix-/Fix+ 35 dpi	69.0545	47.0705	TRUE
Fix-/Fix+ 42 dpi	78.2545	47.0705	TRUE
Fix+ 7 dpi/Fix+ 8 dpi	24.0444	49.4984	FALSE
Fix+ 7 dpi/Fix+ 9 dpi	16.2444	49.4984	FALSE
Fix+ 7 dpi/Fix+ 10 dpi	35.3444	49.4984	FALSE
Fix+ 7 dpi/Fix+ 14 dpi	50	50.7843	FALSE
Fix+ 7 dpi/Fix+ 21 dpi	33.9444	49.4984	FALSE
Fix+ 7 dpi/Fix+ 28 dpi	61.8611	47.5043	TRUE
Fix+ 7 dpi/Fix+ 35 dpi	54.0444	49.4984	TRUE
Fix+ 7 dpi/Fix+ 42 dpi	63.2444	49.4984	TRUE
Fix+ 8 dpi/Fix+ 9 dpi	7.8	48.1782	FALSE
Fix+ 8 dpi/Fix+ 10 dpi	11.3	48.1782	FALSE
Fix+ 8 dpi/Fix+ 14 dpi	25.9556	49.4984	FALSE
Fix+ 8 dpi/Fix+ 21 dpi	9.9	48.1782	FALSE
Fix+ 8 dpi/Fix+ 28 dpi	37.8167	46.1271	FALSE
Fix+ 8 dpi/Fix+ 35 dpi	30	48.1782	FALSE
Fix+ 8 dpi/Fix+ 42 dpi	39.2	48.1782	FALSE
Fix+ 9 dpi/Fix+ 10 dpi	19.1	48.1782	FALSE
Fix+ 9 dpi/Fix+ 14 dpi	33.7556	49.4984	FALSE
Fix+ 9 dpi/Fix+ 21 dpi	17.7	48.1782	FALSE
Fix+ 9 dpi/Fix+ 28 dpi	45.6167	46.1271	FALSE
Fix+ 9 dpi/Fix+ 35 dpi	37.8	48.1782	FALSE
Fix+ 9 dpi/Fix+ 42 dpi	47	48.1782	FALSE
Fix+ 10 dpi/Fix+ 14 dpi	14.6556	49.4984	FALSE
Fix+ 10 dpi/Fix+ 21 dpi	1.4	48.1782	FALSE
Fix+ 10 dpi/Fix+ 28 dpi	26.5167	46.1271	FALSE
Fix+ 10 dpi/Fix+ 35 dpi	18.7	48.1782	FALSE
Fix+ 10 dpi/Fix+ 42 dpi	27.9	48.1782	FALSE
Fix+ 14 dpi/Fix+ 21 dpi	16.0556	49.4984	FALSE
Fix+ 14 dpi/Fix+ 28 dpi	11.8611	47.5043	FALSE
Fix+ 14 dpi/Fix+ 35 dpi	4.04444	49.4984	FALSE
Fix+ 14 dpi/Fix+ 42 dpi	13.2444	49.4984	FALSE
Fix+ 21 dpi/Fix+ 28 dpi	27.9167	46.1271	FALSE
Fix+ 21 dpi/Fix+ 35 dpi	20.1	48.1782	FALSE
Fix+ 21 dpi/Fix+ 42 dpi	29.3	48.1782	FALSE
Fix+ 28 dpi/Fix+ 35 dpi	7.81667	46.1271	FALSE
Fix+ 28 dpi/Fix+ 42 dpi	1.38333	46.1271	FALSE
Fix+ 35 dpi/Fix+ 42 dpi	9.2	48.1782	FALSE
