# Supplementary material for: Spatio-temporal control of mutualism in legumes helps spread symbiotic nitrogen fixation
Source: eLife. 2017 Oct 12;6:e28683. doi: 10.7554/eLife.28683 (PMC5687860; doi:10.7554/eLife.28683)
Supplement: Figure 8—source data 1. [file elife-28683-fig8-data1.xlsx]

## Sheet: Feuil1
Figure 8-Source Data 7. Experimental data for the reproductive fitness of Fix+ and Fix- bacteria following co- inoculation of M. pudica (ratio 1/100) over 49 days.
	Experiment	%Fix+ bacteria	% Fix- bacteria
Inoculum	1	0.5	99.5
Inoculum	2	0.520833	99.4792
Inoculum	3	1.39514	98.6049
14 dpi	1	0	100
14 dpi	2	0	100
14 dpi	3	1.03139	98.9686
21 dpi	1	1.06383	98.9362
21 dpi	2	0	100
21 dpi	3	2.04322	97.9568
28 dpi	1	0	100
28 dpi	2	0	100
28 dpi	3	8.76886	91.2311
35 dpi	1	10.4167	89.5833
35 dpi	2	21.875	78.125
35 dpi	3	2.22094	97.7791
42 dpi	1	13.9785	86.0215
42 dpi	2	21.875	78.125
42 dpi	3	25.513	74.487
49 dpi	1	8.33333	91.6667
49 dpi	2	25.5319	74.4681
