# Supplementary material for: Spatio-temporal control of mutualism in legumes helps spread symbiotic nitrogen fixation
Source: eLife. 2017 Oct 12;6:e28683. doi: 10.7554/eLife.28683 (PMC5687860; doi:10.7554/eLife.28683)
Supplement: Figure 8—source data 2. [file elife-28683-fig8-data2.xlsx]

## Sheet: Feuil1
Figure 8-Source Data 8. Simulation data for the reproductive fitness of Fix+ and Fix- bacteria following co- inoculation of M. pudica (ratio 1/100) over 49 days.
Simulations were run for 1 cycle of 49 days, starting with 1% Fix+ and with 20 plants per pool.
The proportion of Fix+ bacteria after each cycle is indicated for each of the 100 replicate pools of plants (numbered V1 to V100).
	V1	V2	V3	V4	V5	V6	V7	V8	V9	V10	V11	V12	V13	V14	V15	V16	V17	V18	V19	V20	V21	V22	V23	V24	V25	V26	V27	V28	V29	V30	V31	V32	V33	V34	V35	V36	V37	V38	V39	V40	V41	V42	V43	V44	V45	V46	V47	V48	V49
Inoculum	0.01	0.01	0.01	0.01	0.01	0.01	0.01	0.01	0.01	0.01	0.01	0.01	0.01	0.01	0.01	0.01	0.01	0.01	0.01	0.01	0.01	0.01	0.01	0.01	0.01	0.01	0.01	0.01	0.01	0.01	0.01	0.01	0.01	0.01	0.01	0.01	0.01	0.01	0.01	0.01	0.01	0.01	0.01	0.01	0.01	0.01	0.01	0.01	0.01
14 dpi	0	1.19297e-05	1.23102e-08	0	0.0491267	0.000138613	0	4.70264e-05	0	3.93801e-09	5.83303e-06	0	3.37279e-09	0.00124469	1.55608e-06	0.0310671	0.010711	0.0339143	0.000250683	0.00172777	0.0902694	0	0.000249745	0	0	0	2.28055e-07	0.00323387	0	0.00781678	1.13639e-08	3.38009e-05	0.0476907	0	1.31704e-06	0	0.0792255	0.0080914	0.00752027	0	0.111221	0.101307	0.00365363	6.94005e-07	0.0356057	2.52736e-06	0	0	2.05961e-07
21 dpi	0	0.0298611	7.59046e-05	0	0.0715691	0.0408436	0	0.031119	0	2.54609e-05	0.0149065	0	1.91454e-05	0.024506	0.00455276	0.0694302	0.0272705	0.035442	0.0363279	0.061359	0.0721088	0	0.046904	0	0	0	0.00136471	0.0643976	0	0.0663226	0.000136885	0.0440291	0.0903537	0	0.00631363	0	0.0318804	0.0288655	0.0675921	1.03638e-07	0.0290059	0.0365268	0.0777119	0.00419472	0.0408202	0.0113991	7.07913e-09	5.54349e-06	0.00106002
28 dpi	2.19452e-06	0.0952691	0.0363507	5.73919e-08	0.154704	0.0802107	0	0.0408852	0	0.0331731	0.0491935	1.60253e-06	0.035544	0.0317305	0.0368199	0.0653332	0.0403922	0.0286298	0.027756	0.07271	0.102177	0	0.0747225	0	0	0	0.0333087	0.0855381	0	0.101299	0.049304	0.0622366	0.105457	8.10013e-08	0.115307	1.57856e-06	0.0422204	0.0419931	0.11001	0.00147269	0.0323395	0.0763408	0.115609	0.0336354	0.02827	0.0744319	6.48988e-05	0.0306851	0.0467947
35 dpi	0.0192965	0.128467	0.0428932	0.000627392	0.187088	0.111958	0	0.0443453	1.29868e-07	0.0462925	0.093271	0.0132539	0.0506487	0.148047	0.0417683	0.103341	0.13859	0.0720368	0.0607768	0.0917836	0.103074	0	0.0890613	1.06459e-08	0	0	0.097425	0.14424	0	0.159658	0.0514324	0.0815706	0.151254	0.00124192	0.119093	0.016417	0.053278	0.0554049	0.149627	0.0359158	0.0553114	0.0706941	0.143354	0.0437892	0.0559424	0.076564	0.0779436	0.0475799	0.0909212
42 dpi	0.111591	0.178547	0.0491473	0.135207	0.246224	0.131079	0	0.110385	0.00229122	0.0412777	0.120998	0.0984524	0.0876148	0.160466	0.0450733	0.133314	0.14518	0.115039	0.0868673	0.0741899	0.167021	5.29752e-07	0.0824237	0.000131757	0	0	0.148991	0.213096	0	0.200179	0.0704293	0.135633	0.172788	0.0475469	0.17507	0.106816	0.0780313	0.0380344	0.216404	0.0584528	0.0968782	0.0762748	0.209952	0.089535	0.0986073	0.105098	0.0823734	0.0528836	0.173013
49 dpi	0.0923543	0.246359	0.0592371	0.162572	0.251694	0.252235	0	0.104924	0.0493129	0.0722283	0.157085	0.220744	0.130905	0.349385	0.120663	0.211184	0.257759	0.189711	0.118318	0.172105	0.0988538	0.00969295	0.0832534	0.0543872	0	0	0.252447	0.325955	0	0.187635	0.134289	0.294387	0.18944	0.15155	0.235697	0.16897	0.12834	0.0761553	0.254437	0.073363	0.120169	0.176528	0.197094	0.162068	0.0818085	0.112429	0.107355	0.0469502	0.353374
[truncated: 51 more columns]
