# Supplementary material for: Spatio-temporal control of mutualism in legumes helps spread symbiotic nitrogen fixation
Source: eLife. 2017 Oct 12;6:e28683. doi: 10.7554/eLife.28683 (PMC5687860; doi:10.7554/eLife.28683)
Supplement: Figure 9—source data 1. [file elife-28683-fig9-data1.xlsx]

## Sheet: Feuil1
Figure 9A-Source Data 9. Simulation data for the final proportion of Fix+ bacteria after 4 inoculation cycles.
Simulations were run for 4 cycles, starting with 1% Fix+ and with the combination of Number_of_plants and Cycle_length values indicated in leftmost two columns
The final proportion of Fix+ bacteria is indicated for each of the 100 replicate pools of plants (numbered V1 to V100).
Number_of_plants	Cycle_length	V1	V2	V3	V4	V5	V6	V7	V8	V9	V10	V11	V12	V13	V14	V15	V16	V17	V18	V19	V20	V21	V22	V23	V24	V25	V26	V27	V28	V29	V30	V31	V32	V33	V34	V35	V36	V37	V38	V39	V40	V41	V42	V43	V44	V45	V46	V47	V48
1	14	0	0	0	0	0	0	0	0	0	0	0	0	0	0	0	0	0	0	0	0	0	0	0	0	0	0	0	0	0	0	0	0	0	0	0	0	0	0	0	0	0	0	0	0	0	0	0	0
2	14	0	0	0	0	0	0	0	0	0	0	0	0	0	0	0	0	0	0	0	0	0	0	0	0	0	0	0	0	0	0	0	0	0	0	0	0	0	0	0	0	0	0	0	0	0	0	0	0
5	14	0	0	0	0	0	0	0	0	0	0	0	0	0	0	0	0	0	0	0	0	0	0	0	0	0	0	0	0	0	0	0	0	0	0	0	0	0	0	0	0	0	0	0	0	0	0	0	0
10	14	0	0	0	0	0	0	0.481655	0	0	0	0	0	0	0	0	0	0	0	0	0	0	0	0	0	0	0	0	0	0	0	0	0.158677	0	0	0	0	0	0	0	0	0	0	0	0	0	0	0	0
20	14	0	0	0	0.01027	0	0	0	0	0	0	0	0	0	0	0	0.159828	0	0	0	0	0	0	0	0	0	0	0	0	0	0	0	0	0	0	0	0	0	0	0	0	0	0.0896628	0	0	0	0	0	0
50	14	0	0	0	0	0	0	0	0.0409251	0.0262701	0	0.074924	0.071905	0	0	0	0	0	0	0	0	0	0.0578698	0	0	0.0166019	0	0	0	0	0	0	0	0	0	0	0	0	0.121899	0	0	1.78625e-05	0.0370436	0	0.0637375	0	0	0	0.0113815
100	14	0	0.0545605	0	3.63337e-05	0.00672451	0.0394578	0	0	0	0	0.0232654	0	0	0	0.000550749	3.38879e-09	0.00958257	0	0	0.0351841	0.0259233	0.00835451	0	0.00411341	3.61883e-09	0.065974	0	0.019526	0.0785862	0	0.0194384	0	0	0.0047952	0	0	0	3.09416e-06	0	0	0	0.00708298	0	0	0.0771987	4.35823e-05	0	3.67275e-05
1	21	0	0	0	0	0	0	0	0	0	0	1	0	0	0	0	0	0	0	0	0	0	0	0	0	0	0	0	0	0	0	0	0	0	0	0	0	0	0	0	0	0	0	0	0	0	0	0	0
2	21	0	1	0	0	0	0	0	0	0	0	0	0	0	0	0	0	0	0.680397	0	0.997284	0	0	0	0	0	0	0	0	0	0	0	0	0	0	0	0	0	0	0	0	0.891732	0	0.692301	0	0.999989	0.549814	0	0
5	21	0	0	0	0	0.797671	0	0	0	0.768155	0	0	0	0	0.529348	0	0	0	0	0.595367	0	0.0926989	0	0	0	0	0	0	0.677687	0.998157	0	0	0	0	0	0	0.768723	0	0	0	0	0	0.521068	0	0.832132	0.772723	0	0	0
10	21	0	0	0	0	0	0.272303	0	0	0	0	0	0	0.617669	0	0.914047	0	0	0	0	0	0.940921	0.703617	0	0.828571	0.588905	0	0	0	0	0	0.346708	0	0	0	0.405322	0.341373	0.195703	0	0	0	0	0.822388	0	0	1.8556e-07	0	0	0
20	21	0.0366616	0	0.0771461	0.629005	0.697582	0.385507	0.0752346	0.33339	0.275843	0	0.301538	0.194309	0	0.351995	0	0	0	0	0	0.424529	0.54718	0	0	0.531805	0.558844	0	0	0	0.458776	0	0	0.448528	0	0.440479	0.273238	0	0	0.468422	0.293826	0.554985	0	0	0	0.113083	0.222798	0	0.700485	0.408141
50	21	0.0332502	0.560814	0	0.216579	0.341261	0.0468119	0.341594	0.16794	0.359387	0.258347	0.426737	0.0483619	0.455462	0.267244	0.318017	0.517392	0.222224	0.445448	0.328297	0.495096	0.116078	0.0348179	0.0669627	0	0.255912	0.165857	0.145032	0	0.204446	0.441645	0.428258	0.299434	0.355889	0.237225	0.521514	0.531451	0	0.30375	0.267	0.0288347	0.414419	0.277369	0	0.394721	0.132569	0.376211	0	0.423565
100	21	0.0975782	0.0888719	0.193085	0.402359	0.138423	0.205961	0.311611	0.416621	0.0762993	0.373422	0.457943	0.299388	0.387876	0.327525	0.102773	0.206644	0.14328	0.341475	0.147082	0.468886	0.255892	0.435946	0.227615	0.26053	0.177401	0.331818	0.413317	0.261985	0.259852	0.38365	0.0212997	0.362064	0.235009	0.134912	0.418431	0.257629	0.198995	0.454236	0.441866	0.251285	0.51578	0.298941	0.4426	0.157783	0	0.340097	0.226011	0.515303
1	28	0	0	0	0	0	0	0	0	0	0	1	0	0	0	0	0	0	0	0	0	0	1	0	0	0	0	0	1	0	0	0	0	0	0	1	0	0	0	0	0	0	0	0	1	0	0	0	0
2	28	0	0	0	0	0	0	0	0	0	0	0	1	0	0	0	0	0	0	0	0	0	0	0.999976	0	0	0	0	0	0	0	0	1	0	0	0	1	0	0	0.985166	0	0	0	0	0	0	1	0	0
5	28	0	0	0	0.870169	1	0	0	0	0	0	0	0	0.999999	0	0	0	0.998325	1	0	0	0	0	0	0	0.999475	0	0	0	0.999867	0	0	0	0	0	0	0	1	0	0	0	0	1	0	0	0	0	0	0.999993
10	28	0.842221	0	0	0.826218	0.950287	0	0.67813	0	0	0.818646	0.750969	0.989351	0.716176	0.976065	0.957133	0	0	0	0	0	0.972199	0.94863	0	0.995675	0.990701	0.919879	0	0	0	0.967441	0.954441	0.768775	0.890784	0.905239	0	0.999917	0.990357	0.980246	0.913055	0	0.999896	0.927812	0.77774	1	0.924925	0	0	0
20	28	0	0.732928	0.725076	0.878699	0.924353	0.734067	0	0.757352	0	0.891366	0.937606	0.91628	0.985257	0	0.857506	0.893292	0	0	0	0.90485	0	0.979314	0.885311	0.976673	0.953896	0.671837	0.924801	0.871526	0.978673	0.853846	0	0.942299	0.999566	0.926504	0	0.709098	0.79853	0	0	0	0.932574	0	0.727272	0.965391	0	0	0.849154	0
50	28	0.874884	0.68428	0.676533	0.789127	0.940499	0.915524	0.895836	0.766851	0.531518	0.882679	0.582613	0.735722	0.0178291	0.7388	0.803054	0.784239	0.858438	0.961171	0.93162	0.784462	0.594315	0.925282	0.885592	0.668307	0.918626	0.880557	0.819482	0.896123	0.893364	0.801614	0.838915	0.909002	0.888567	0.955226	0.522159	0.784047	0.794012	0.81817	0.77433	0.948853	0.640706	0.872467	0.874557	0.789269	0.799971	0.817426	0.827267	0.98859
100	28	0.925682	0.877104	0.605726	0.878574	0.919939	0.946772	0.897548	0.892607	0.621189	0.861995	0.870256	0.786955	0.818682	0.853985	0.834632	0.913423	0.916346	0.81581	0.840208	0.891366	0.928763	0.813786	0.899556	0.948935	0.90071	0.855837	0.859157	0.83986	0.911058	0.86151	0.929974	0.87216	0.890156	0.858352	0.727359	0.846705	0.798736	0.939143	0.706508	0.908077	0.852825	0.769305	0.755141	0.935695	0.875534	0.885545	0.906477	0.909781
1	35	0	0	0	0	0	0	0	0	0	0	0	0	1	0	0	0	0	0	0	0	0	0	0	0	0	0	0	0	0	0	0	0	0	1	0	0	0	0	0	0	0	0	0	0	0	0	0	0
2	35	1	0	0	0	0	0	0	0.926367	1	0	0	0.999826	0	0	0	0	1	0	1	0	1	0	0	0	0	0	0	0	0	1	0	1	0	0	1	1	0	1	1	0	0	0	0	0	1	0	0	1
5	35	0	0	0	0	0.999735	0.998898	0.947959	0	0.986941	0.965199	0	0	0	0	0	0	0	0	0	0	0	0.999989	0	1	0	0	0.999999	0	0.999986	0	0	0	1	0	0	0	0.960112	0	0.999671	1	1	0	0	0	1	0.996974	0	0.971479
10	35	0	0	0	0.974902	0	0	0.998386	0	1	1	0	0.985183	0	0.999561	0.999218	0.992093	0.999846	0.965549	0	0	0	0.977756	0	0.999944	0.999368	0.960243	0	0	0	0.975079	0	0.999994	1	0.962524	0	0.983575	0	0	1	0.982241	0.996422	0.999955	0.969826	0	0.693494	0	0.997513	1
20	35	0.96842	0	0.988973	0.998106	0	0.998962	0.997832	0.999922	0.99997	0.949787	0.999652	0.992656	0.894807	0.985195	0.996126	0.999679	0.985089	0	0.980508	0.989997	0.936215	0.970257	0.961882	0.99721	0.977809	0.982967	0.999469	0.99915	0	0.989451	0.982204	0.990695	0.999916	0	0.986488	0.877489	0	1	0.751009	0.991332	0.999684	0.948838	0.903853	0.991634	0.963299	0.989706	0.999912	0.999997
50	35	0.982114	0.979998	0.971775	0.988073	0.965289	0.988928	0.970808	0.991657	0.979107	0.977288	0.972471	0	0.718008	0.999711	0.98458	0.982262	0.990955	0.973921	0.98601	0.987841	0.979754	0.991293	0.976523	0.94774	0.982544	0.964164	0.991216	0.956535	0.986651	0.994369	0.999773	0.976188	0.960324	0.99159	0.988109	0.977984	0.993175	0.98623	0.978406	0.980981	0.982148	0.986195	0.985679	0.841079	0.953317	0.990165	0.987899	0.984826
100	35	0.98718	0.976969	0.976601	0.983209	0.985253	0.989093	0.98832	0.985429	0.991632	0.984798	0.977683	0.997634	0.942551	0.991229	0.991276	0.993106	0.985588	0.988544	0.981504	0.989611	0.9646	0.980241	0.942753	0.96631	0.985722	0.975676	0.984907	0.979193	0.98099	0.977966	0.983244	0.975958	0.991196	0.979709	0.965923	0.982816	0.982786	0.980719	0.957952	0.986947	0.988874	0.994438	0.99033	0.991184	0.9973	0.982434	0.994733	0.991265
1	42	0	0	0	0	0	0	0	0	0	0	0	0	1	0	0	0	0	0	0	0	0	0	0	0	0	0	0	0	0	0	0	0	0	0	0	0	0	0	1	0	0	0	0	0	0	1	0	0
2	42	0	0	1	0	1	0	1	1	0	0	0	1	0	0	0	0	0	0	0	0	0	0	0	1	0	0	0	0	1	0	1	1	1	1	0	0	0	0.92419	0	0.999975	0	0	1	0	0	0	0	0
5	42	0.972395	1	1	0	0	1	1	0	0	0	0.956142	0	1	0	1	1	1	0.998782	0	0	0	1	1	0	0	0	0	0	1	0	0	1	0	0	1	1	1	0	0	0	1	0	1	0	0	1	0	0
10	42	0.999305	0.983869	1	0.997108	1	0	1	0	0	0	0	0.999995	1	1	0.976671	0	0	0	1	0.999999	0	1	0.995065	1	1	1	0	1	0	1	1	0	1	0.999313	0	0	0.992195	1	0	0	0	1	0.986475	0	1	0.999933	0	0.999507
20	42	0.999998	0	0	1	1	1	1	1	1	1	0	1	0.990618	1	1	0.99283	0.989693	0.99155	1	1	1	0.999718	1	1	0.999653	1	0.992655	1	0.996447	1	0.999997	0	1	0.992669	1	0.992315	0.992226	0.973404	0.999995	0.999997	0.982844	1	0.999999	0.996585	1	1	1	1
50	42	1	0.999748	1	0.995083	0.997223	0.996449	0.998816	0.999894	0.997445	0.995682	0.997188	0.998701	0.998766	1	0.996975	0.987547	0.997118	0.999845	0.996954	0.996907	0.997227	0.992218	0.999873	1	0.998861	0.99172	0.999999	1	0.998849	1	0.999989	0.994299	0.997008	0.993573	0.998799	0.996859	0.988987	0.999993	0.999999	0.996951	0.997097	1	0.997131	0.997189	0.999631	0.996359	1	0.993813
100	42	0.99981	1	0.996502	0.998302	0.998478	0.99374	0.99861	0.993085	0.998519	0.998501	0.999974	0.994159	0.996163	0.996869	0.994624	0.997081	0.996381	0.998208	0.996965	0.99539	0.993416	0.996533	0.998744	0.996947	0.995065	0.993741	0.996289	0.998496	0.999995	0.997472	0.999983	0.997493	0.998411	0.998479	0.996956	0.997554	0.999327	0.997585	0.994776	0.997134	0.995492	0.998546	0.997894	0.998878	0.994837	0.976796	0.9905	0.995818
1	49	0	0	0	0	0	0	1	0	0	0	0	0	0	0	0	0	0	1	0	0	0	0	0	0	0	0	0	0	0	0	0	0	0	0	0	0	0	0	0	0	0	0	0	0	0	1	1	1
2	49	0	0	1	0	0	0	0	0	0	0	0	1	0	0	1	0	0	0	1	1	1	0	0	0	0	0	1	0	0	0	1	1	1	0	0	0	0	0	0	0	0	1	1	0	1	0	0	0
5	49	0	0	1	0	1	0	0	1	0	0	0	1	0	0	0	0	0	1	1	1	0	0	0	1	0	0	0	1	0	1	1	0	1	1	1	1	1	0	1	1	1	0	1	0	1	0	1	1
10	49	1	1	1	1	0	1	0.999297	1	1	1	0	1	1	0	1	0.993637	1	0	1	1	1	1	1	1	1	1	1	1	1	1	1	0	1	1	1	1	1	1	1	1	1	0	1	0	0	1	0	0
20	49	1	1	0	0.999931	1	0.999982	1	1	1	1	0	1	1	1	0.999706	1	0	1	1	0.994026	1	1	1	0.996782	1	0.997688	1	1	1	1	1	0.997298	0	1	1	1	1	0.994139	1	1	0	0.999996	0.993498	1	1	1	1	1
50	49	0.999989	1	1	1	0.999975	0.999879	0.99887	1	1	1	0.999998	0.995067	1	1	1	1	1	1	1	1	1	0.999999	1	1	1	1	0.999999	1	0.999656	0.999999	0.997371	1	1	1	1	1	1	1	1	1	0.988051	1	0.999999	1	1	1	1	1
100	49	0.999938	1	0.998639	1	1	1	0.998477	1	1	1	1	1	1	1	1	0.99944	1	0.999999	0.998604	1	1	1	1	0.999952	1	1	1	1	0.999995	0.999999	1	1	0.998538	0.998567	1	1	0.997896	1	0.999994	0.998575	1	1	0.999995	1	1	1	1	1
[truncated: 52 more columns]
