# Supplementary material for: Spatio-temporal control of mutualism in legumes helps spread symbiotic nitrogen fixation
Source: eLife. 2017 Oct 12;6:e28683. doi: 10.7554/eLife.28683 (PMC5687860; doi:10.7554/eLife.28683)
Supplement: Figure 9—source data 2. [file elife-28683-fig9-data2.xlsx]

## Sheet: Feuil1
Figure 9B-Source Data 10. Simulation data for the increase in proportion of Fix+ bacteria along 10 cycles.
Simulations were run for 10 cycles of varying length (between 14 and 49 days, as indicated in column 'Days'), with pools of 20 plants and with 1% Fix+in the inoculum
The proportion of Fix+ bacteria ('Percent_Fix+') after each cycle is indicated for 5 replicate pools of plants (numbered 1 to 5 in the column 'Replicate').
Days	Replicate	Percent_Fix+	Cycle
14 days	1	0.01	0
14 days	1	0.00245363	1
14 days	1	0	2
14 days	1	0	3
14 days	1	0	4
14 days	1	0	5
14 days	1	0	6
14 days	1	0	7
14 days	1	0	8
14 days	1	0	9
14 days	1	0	10
14 days	2	0.01	0
14 days	2	0.00066474	1
14 days	2	0	2
14 days	2	0	3
14 days	2	0	4
14 days	2	0	5
14 days	2	0	6
14 days	2	0	7
14 days	2	0	8
14 days	2	0	9
14 days	2	0	10
14 days	3	0.01	0
14 days	3	3.63956e-08	1
14 days	3	0	2
14 days	3	0	3
14 days	3	0	4
14 days	3	0	5
14 days	3	0	6
14 days	3	0	7
14 days	3	0	8
14 days	3	0	9
14 days	3	0	10
14 days	4	0.01	0
14 days	4	0.0100387	1
14 days	4	0.138446	2
14 days	4	0.263543	3
14 days	4	0.19036	4
14 days	4	0.176064	5
14 days	4	0.290346	6
14 days	4	0.230495	7
14 days	4	0.551977	8
14 days	4	0.507898	9
14 days	4	0.659669	10
14 days	5	0.01	0
14 days	5	0.032318	1
14 days	5	0.1235	2
14 days	5	0.18923	3
14 days	5	0.314415	4
14 days	5	0.19904	5
14 days	5	0.220988	6
14 days	5	0.147439	7
14 days	5	0.142442	8
14 days	5	0.198443	9
14 days	5	0.18263	10
21 days	1	0.01	0
21 days	1	0	1
21 days	1	0	2
21 days	1	0	3
21 days	1	0	4
21 days	1	0	5
21 days	1	0	6
21 days	1	0	7
21 days	1	0	8
21 days	1	0	9
21 days	1	0	10
21 days	2	0.01	0
21 days	2	0.0333062	1
21 days	2	0.0865447	2
21 days	2	0.173116	3
21 days	2	0.385352	4
21 days	2	0.633405	5
21 days	2	0.852938	6
21 days	2	0.941908	7
21 days	2	0.99927	8
21 days	2	1	9
21 days	2	1	10
21 days	3	0.01	0
21 days	3	0.0376625	1
21 days	3	0.104361	2
21 days	3	0.343601	3
21 days	3	0.63014	4
21 days	3	0.915781	5
21 days	3	0.936129	6
21 days	3	0.981854	7
21 days	3	0.975877	8
21 days	3	0.993118	9
21 days	3	0.993786	10
21 days	4	0.01	0
21 days	4	0.0320655	1
21 days	4	0.00303747	2
21 days	4	1.11749e-07	3
21 days	4	0	4
21 days	4	0	5
21 days	4	0	6
21 days	4	0	7
21 days	4	0	8
21 days	4	0	9
21 days	4	0	10
21 days	5	0.01	0
21 days	5	0	1
21 days	5	0	2
21 days	5	0	3
21 days	5	0	4
21 days	5	0	5
21 days	5	0	6
21 days	5	0	7
21 days	5	0	8
21 days	5	0	9
21 days	5	0	10
28 days	1	0.01	0
28 days	1	0.110877	1
28 days	1	0.189118	2
28 days	1	0.685439	3
28 days	1	0.944507	4
28 days	1	0.990286	5
28 days	1	1	6
28 days	1	1	7
28 days	1	1	8
28 days	1	1	9
28 days	1	1	10
28 days	2	0.01	0
28 days	2	0.0739166	1
28 days	2	0.274482	2
28 days	2	0.70257	3
28 days	2	0.928616	4
28 days	2	0.999275	5
28 days	2	1	6
28 days	2	1	7
28 days	2	1	8
28 days	2	1	9
28 days	2	1	10
28 days	3	0.01	0
28 days	3	0.0424009	1
28 days	3	0.216951	2
28 days	3	0.455021	3
28 days	3	0.886805	4
28 days	3	0.977233	5
28 days	3	0.999613	6
28 days	3	1	7
28 days	3	1	8
28 days	3	1	9
28 days	3	1	10
28 days	4	0.01	0
28 days	4	0.119314	1
28 days	4	0.290422	2
28 days	4	0.757219	3
28 days	4	0.957456	4
28 days	4	0.999962	5
28 days	4	1	6
28 days	4	1	7
28 days	4	1	8
28 days	4	1	9
28 days	4	1	10
28 days	5	0.01	0
28 days	5	0.0433365	1
28 days	5	0.109746	2
28 days	5	0.414523	3
28 days	5	0.689103	4
28 days	5	0.977048	5
28 days	5	0.999997	6
28 days	5	1	7
28 days	5	1	8
28 days	5	1	9
28 days	5	1	10
35 days	1	0.01	0
35 days	1	0.0998532	1
35 days	1	0.317196	2
35 days	1	0.751193	3
35 days	1	0.987125	4
35 days	1	1	5
35 days	1	1	6
35 days	1	1	7
35 days	1	1	8
35 days	1	1	9
35 days	1	1	10
35 days	2	0.01	0
35 days	2	0.0421085	1
35 days	2	0.342613	2
35 days	2	0.822711	3
35 days	2	0.977213	4
35 days	2	0.988267	5
35 days	2	0.99256	6
35 days	2	1	7
35 days	2	1	8
35 days	2	1	9
35 days	2	1	10
35 days	3	0.01	0
35 days	3	0.0130473	1
35 days	3	0.0850691	2
35 days	3	0.37218	3
35 days	3	0.908484	4
35 days	3	0.981196	5
35 days	3	1	6
35 days	3	1	7
35 days	3	1	8
35 days	3	1	9
35 days	3	1	10
35 days	4	0.01	0
35 days	4	0.113705	1
35 days	4	0.486738	2
35 days	4	0.9124	3
35 days	4	0.996709	4
35 days	4	0.999971	5
35 days	4	1	6
35 days	4	1	7
35 days	4	1	8
35 days	4	1	9
35 days	4	1	10
35 days	5	0.01	0
35 days	5	0.0776724	1
35 days	5	0.439496	2
35 days	5	0.852867	3
35 days	5	0.985408	4
35 days	5	1	5
35 days	5	1	6
35 days	5	1	7
35 days	5	1	8
35 days	5	1	9
35 days	5	1	10
42 days	1	0.01	0
42 days	1	0.238015	1
42 days	1	0.822809	2
42 days	1	0.990503	3
42 days	1	1	4
42 days	1	1	5
42 days	1	1	6
42 days	1	1	7
42 days	1	1	8
42 days	1	1	9
42 days	1	1	10
42 days	2	0.01	0
42 days	2	0.097614	1
42 days	2	0.514259	2
42 days	2	0.926648	3
42 days	2	0.999997	4
42 days	2	1	5
42 days	2	1	6
42 days	2	1	7
42 days	2	1	8
42 days	2	1	9
42 days	2	1	10
42 days	3	0.01	0
42 days	3	0.145654	1
42 days	3	0.608703	2
42 days	3	0.96071	3
42 days	3	0.999995	4
42 days	3	1	5
42 days	3	1	6
42 days	3	1	7
42 days	3	1	8
42 days	3	1	9
42 days	3	1	10
42 days	4	0.01	0
42 days	4	0.170967	1
42 days	4	0.540605	2
42 days	4	0.934614	3
42 days	4	1	4
42 days	4	1	5
42 days	4	1	6
42 days	4	1	7
42 days	4	1	8
42 days	4	1	9
42 days	4	1	10
42 days	5	0.01	0
42 days	5	0.167319	1
42 days	5	0.597259	2
42 days	5	0.95179	3
42 days	5	0.999982	4
42 days	5	1	5
42 days	5	1	6
42 days	5	1	7
42 days	5	1	8
42 days	5	1	9
42 days	5	1	10
49 days	1	0.01	0
49 days	1	0.0626441	1
49 days	1	0.440212	2
49 days	1	0.973021	3
49 days	1	0.9997	4
49 days	1	1	5
49 days	1	1	6
49 days	1	1	7
49 days	1	1	8
49 days	1	1	9
49 days	1	1	10
49 days	2	0.01	0
49 days	2	0.272648	1
49 days	2	0.899925	2
49 days	2	0.999972	3
49 days	2	1	4
49 days	2	1	5
49 days	2	1	6
49 days	2	1	7
49 days	2	1	8
49 days	2	1	9
49 days	2	1	10
49 days	3	0.01	0
49 days	3	0.227663	1
49 days	3	0.859861	2
49 days	3	1	3
49 days	3	1	4
49 days	3	1	5
49 days	3	1	6
49 days	3	1	7
49 days	3	1	8
49 days	3	1	9
49 days	3	1	10
49 days	4	0.01	0
49 days	4	0.173545	1
49 days	4	0.687477	2
49 days	4	0.984785	3
49 days	4	1	4
49 days	4	1	5
49 days	4	1	6
49 days	4	1	7
49 days	4	1	8
49 days	4	1	9
49 days	4	1	10
49 days	5	0.01	0
49 days	5	0.0165253	1
49 days	5	0.0931508	2
49 days	5	0.620048	3
49 days	5	0.999936	4
49 days	5	1	5
49 days	5	1	6
49 days	5	1	7
49 days	5	1	8
49 days	5	1	9
49 days	5	1	10
