# Supplementary material for: Spatio-temporal control of mutualism in legumes helps spread symbiotic nitrogen fixation
Source: eLife. 2017 Oct 12;6:e28683. doi: 10.7554/eLife.28683 (PMC5687860; doi:10.7554/eLife.28683)
Supplement: Figure 9—source data 3. [file elife-28683-fig9-data3.xlsx]

## Sheet: Feuil1
Figure 9-Figure supplement 1-Source Data 13. Simulation data for the effect of cycle length and plant number on the Fix+ population sizes after 4 cycles.
Simulations were run for 4 cycles, starting with 0.1% Fix+ and with the combination of Number_of_plants and Cycle_length values indicated in leftmost two columns
The final proportion of Fix+ bacteria is indicated for each of the 100 replicate pools of plants (numbered V1 to V100).
Number_of_plants	Cycle_length	V1	V2	V3	V4	V5	V6	V7	V8	V9	V10	V11	V12	V13	V14	V15	V16	V17	V18	V19	V20	V21	V22	V23	V24	V25	V26	V27	V28	V29	V30	V31	V32	V33	V34	V35	V36	V37	V38	V39	V40	V41	V42	V43	V44	V45	V46	V47	V48
1	14	0	0	0	0	0	0	0	0	0	0	0	0	0	0	0	0	0	0	0	0	0	0	0	0	0	0	0	0	0	0	0	0	0	0	0	0	0	0	0	0	0	0	0	0	0	0	0	0
5	14	0	0	0	0	0	0	0	0	0	0	0	0	0	0	0	0	0	0	0	0	0	0	0	0	0	0	0	0	0	0	0	0	0	0	0	0	0	0	0	0	0	0	0	0	0	0	0	0
10	14	0	0	0	0	0	0	0	0	0	0	0	0	0	0	0	0	0	0	0	0	0	0	0	0	0	0	0	0	0	0	0	0	0	0	0	0	0	0	0	0	0	0	0	0	0	0	0	0
50	14	0	0	0	0	0	0	0	0	0	0	0	0	0	0	0	0	0	0	0	0	0	0	0	0	0	0	0	0	0	0	0	0	0	0	0	0	1.13191e-07	0	0	0	0	0	0	0	0	0	0	0
100	14	0.0201126	0	0	0.00834683	0	0	0	0	0	0	0	0	0	0.000598587	0	0	0	0	0	0	0	0	0	0	0	0	0	0	0	0	0	0	0	0	0	0	0	0	0	0	0	0	0	0	0	0	0	0
500	14	0	0	0.0101841	0	0	0	0	0	0	0	0	0	0	0	0.000445993	0	0	0.0128206	0	0	0	0	0	0	0	0	0	0	0	0	0	0.0060918	0	0	0	0	0	0	0	0	0	0	0	0	0	0	0	0.00363581
1000	14	0.000214581	0.00163735	0.0032936	0	0.00328712	0	0	0	5.22904e-09	0	0	1.96667e-08	0.00243674	0	0.00428674	0	0	0.000269805	4.00549e-06	0	0	0	0.00422379	0.00581132	0.0010325	0	0	0	0	0.00355741	0.00062541	0	0	7.2668e-08	0	0	0	0	0	0	0	0.00201006	0	0	0	0	0.00452764	0
1	21	0	0	0	0	0	0	0	0	0	0	0	0	0	0	0	0	0	0	0	0	0	0	0	0	0	0	0	0	0	0	0	0	0	1	0	0	0	0	0	0	0	0	0	0	0	0	0	0
5	21	0	0	0	0	0	0	0	0	0	0	0	0	0	0	0	0	0	0	0	0	0	0	0	0	0	0	0	0	0	0	0	0	0	0	0	0	0	0	0	0	0	0	0	0	0	0	0	0
10	21	0	0	0	0	0	0	0	0	0	0.891441	0	0	0	0	0	0	0	0	0	0	0	0	0	0	0	0	0	0	0	0	0	0	0	0	0	0	0	0	0	0	0	0	0	0	0	0	0	0
50	21	0	0	0	0	0.179821	0.280717	0	0	0	0	0	0	0	0	0	0.178273	0.163631	0	0	0	0	0	0	0.368351	0	0.101941	0	0	0.318959	0	0.219541	0	0.106848	0	0	0	0	0	0	0	0	0	7.68375e-10	0	0	0	0	0.116389
100	21	0	0	0.0911286	0	0	0	0	0	0	0.0783673	0	0	0	0	0.0655248	0.0635385	0.0684381	0.0464896	0	0.0638526	0	0.145617	0	0	0	0	0	0	0.0190987	0	0	0.15481	0.0758737	0.0847349	0	0	0	0	0.0313291	0.0590126	0	0	0	0	0	0.0790907	0	0.328508
500	21	0.0338619	0.0311137	0	0.00410478	0.0234536	0.135682	0.11323	0.0322133	0.021794	0.0197518	0.0150787	0.0800027	0.0897219	0.0028878	0.0448081	0.035086	0.0204605	0.018607	0.0853913	0.0789596	0.0265774	0.0403798	0.00601976	0.0315838	0.0125194	0	0.0603112	0.0170706	0.0360344	0.0101817	0	0.00237037	0.0847179	0.0612523	0	0.0294661	0.00552076	0.0759724	0.0102791	0.0699247	0.00713846	0.00639742	0.0854049	0.00982459	0.0262975	0.0294369	0.0613191	0
1000	21	0.0231345	0.0129142	0.00633189	0	0.0542016	0.0667336	0.010335	0.0483319	0.0282805	0.0139347	0.00918063	0.0411897	0.030899	0.037239	0	0.0428544	0.0389245	0.0382888	0.0331772	0.0128244	0.0398921	0.0236575	0.00420542	0.0329973	0.0401414	0.0115676	0.0166845	0.0165501	0.0542172	0.0649687	0.0249973	0.0171178	0.00441153	0.0547088	0.0349104	0.0715633	0.0260809	0.0954063	0.0317605	0.0306476	0.0957507	0.0387918	0.0284192	0.00380983	0.0995638	0.030665	0.0433082	0.0462619
1	28	0	0	0	0	0	0	0	0	0	0	0	0	0	0	0	0	0	0	0	0	0	0	0	0	0	0	0	0	0	0	0	0	0	0	0	0	0	0	0	0	0	0	0	0	0	0	0	0
5	28	0	0	0	0	0	0	0	0	0	0	0	0	0	0	0	0	0	0	0	0	0	0	0	0	0	0	0	0	0	0	0	0.940463	0	0	0	0	0	0	0	0	0	0	0	0	0	0	0	0
10	28	0	0	0	0	0	0	0	0	0	0	0	0	0	0	0	0	0	0	0	0	0	0	0	0	0	0.99876	0	0	0	0	0	0	0.975092	0	0	0	0	0	0	0	0	0	0	0	0	0	0.656436	0
50	28	0.845515	0	0	0	0	0	0	0	0.777713	0	0	0	0.851459	0.779151	0	0	0.790988	0	0	0	0.53741	0.63781	0.609213	0.897767	0.695962	0.192351	0	0.702542	0	0	0	0.673366	0	0.74324	0	0	0.901998	0	0	0	0	0	0	0.811273	0.81924	0	0	0
100	28	0.406399	0.782	0	0	0	0	0	0	0	0.440531	0	0	0.763923	0.565199	0.678211	0.482876	0	0	0.446391	0.792066	0.326705	0.182135	0.533233	0	0.18951	0.664019	0.461796	0	0.580621	0	0	0.361148	0.386314	0.394687	0	0	0.437549	0.653	0	0.22418	0	0.49653	0.670503	0.614029	0	0.576748	0	0.755841
500	28	0.30908	0.385606	0.363308	0.411994	0.340227	0	0.0851546	0.347486	0.2648	0.541516	0.411689	0.384565	0.36097	0.324885	0.0780944	0.479178	0.166391	0.330847	0.233985	0.324756	0.404866	0.33486	0.206213	0.220498	0.414007	0.249849	0.50535	0.295361	0.14493	0.521266	0.484723	0.13166	0.570185	0.370283	0.155265	0.252777	0.457363	0.455129	0.425337	0	0.449348	0.605943	0.376909	0.35332	0.349454	0.26322	0.446965	0.205965
1000	28	0.501708	0.139366	0.275617	0.420442	0.344896	0.244544	0.218763	0.470219	0.418487	0.365984	0.391855	0.253158	0.22201	0.330614	0.307528	0.160142	0.226215	0.198098	0.437773	0.441979	0.454659	0.161023	0.461714	0.342979	0.492358	0.405403	0.614655	0.532304	0.413959	0.296191	0.351191	0.23557	0.43515	0.437441	0.279193	0.216689	0.493487	0.355173	0.420586	0.320604	0.410256	0.470077	0.347828	0.430439	0.281608	0.42392	0.478467	0.376337
1	35	0	0	0	0	0	0	0	0	0	0	0	0	0	0	0	0	0	0	0	0	0	0	0	0	0	0	0	0	0	0	0	0	0	0	0	0	0	0	0	0	0	0	0	0	0	0	0	0
5	35	0	0	0	0	0	0	0	0	0	0	0	0	0	1	0	0	0	0	0	0	0	0	0	1	0	0	0	0	0	0	0	0	0	0	0	0	0	0	0	0	0	0	0	0	0	0	0	0
10	35	0	0	0	0	0	0	0	0	0	0	0	0	0	0	0	0	0	0	0	0	0	0	0	0	0	0	0	0	0	0	1	0	0	0	0	0	0	0	0	0	0	0	0	0	0.982153	0.97693	0	0
50	35	0	0.578485	0	0	0	0	0.960826	0	0	0	0.932136	0	0.921683	0.891114	0	0	0	0	0	0	0	0	0.963438	0.911239	0.953073	0	0.914998	0	0.603125	0	0	0	0.957658	0	0.817037	0	0	0.730448	0	0	0	0	0.876784	0.876593	0	0.855933	0	0
100	35	0.86845	0	0.948378	0.951013	0	0.628687	0	0.86253	0.90225	0.879857	0.912823	0.877318	0.934806	0.895152	0.931318	0.786279	0	0.619827	0.825159	0	0	0	0.894272	0.818523	0.92933	0.877098	0.788245	0.78929	0	0.924187	0.931747	0.885142	0	0.797762	0.842873	0.837813	0.934247	0.889111	0	0.601154	0.789381	0.911687	0	0	0.686981	0.831231	0.917383	0.741085
500	35	0.896444	0.754743	0.666781	0.578691	0.87574	0.838119	0.632081	0.915651	0.795077	0.542087	0.677654	0.758347	0.739919	0.627702	0.764118	0.717	0.750977	0.866279	0.782834	0.806234	0.781777	0.775326	0.518334	0.91497	0.570474	0.857298	0.744645	0.327993	0.663176	0.902221	0.83677	0.786998	0.763518	0.72325	0.765033	0.667285	0.593909	0.690674	0.898892	0.84953	0.781534	0.515987	0.891243	0.585157	0.711114	0.800342	0.855089	0.774869
1000	35	0.868954	0.738961	0.860679	0.755861	0.723243	0.727207	0.850532	0.847481	0.842772	0.774342	0.754439	0.737929	0.698967	0.81584	0.712999	0.808027	0.839053	0.834774	0.61856	0.730409	0.790646	0.875912	0.829405	0.856724	0.822933	0.829012	0.771685	0.752852	0.714586	0.72881	0.874663	0.737381	0.828958	0.852229	0.82695	0.804911	0.737475	0.626695	0.762498	0.757583	0.89034	0.689862	0.821098	0.796184	0.764336	0.816515	0.782905	0.865664
1	42	0	0	0	0	0	0	0	0	0	0	0	0	0	0	0	0	0	0	0	0	0	0	0	0	0	0	0	0	0	0	0	0	0	0	0	0	0	0	0	0	0	0	0	0	0	0	0	0
5	42	0	0	0	0	0	0	0	0	0	0	0	0	0	0	0	0	0	0	0	0	0	0	0	0	0	0	0	0	0	0	0	0	0	0	0	0	0	0	0	0	0	0	0	0	0	0	0	0
10	42	0	0	0	0	0	0	0	0	0	0	0	0	0	0	0	0	0.999995	0	0	0	1	0	0	0	0	1	0	0	0	0	0	0	1	1	0	0	0	0	0	0	0	0	0	0	0	0	0	0
50	42	0	0	0	0	0	0	0.948474	0.989	0	0	0	0	0.713324	0	0.992046	0	0	0	0.97639	0	0	0	0.980556	0.845171	0	0	0	0.973892	0	0	0	0	0	0.988289	0	0.983506	0	0.924104	0	0	0	0.996706	0.970121	0	0.988035	0	0	0
100	42	0.956098	0	0.927396	0	0.949974	0.934902	0.954991	0.957802	0.954806	0	0.900834	0	0	0.966847	0.952492	0.964001	0.980634	0	0.972236	0.946824	0.957616	0.96461	0.925318	0.985807	0.974503	0.964259	0.822863	0.977951	0.972248	0.960081	0.924023	0	0.983427	0.991635	0.982403	0.986901	0	0	0.882921	0	0.962705	0.991453	0.975901	0	0.978606	0	0.956116	0.977675
500	42	0.952709	0.972614	0.863737	0.963034	0.964578	0.963949	0.726004	0.952114	0.958949	0.973379	0.773959	0.983724	0.878416	0.981405	0.928762	0.911718	0.969697	0.97527	0.965278	0.978979	0.937136	0.974969	0.932691	0.942624	0.93345	0.959159	0.966058	0.963685	0.964676	0.890268	0.974573	0.925461	0.972433	0.965155	0.969699	0.905681	0.944715	0.975994	0.929699	0.972189	0.966812	0.942118	0.932242	0.966538	0.938632	0.658564	0.955669	0.958837
1000	42	0.950058	0.96972	0.969433	0.93342	0.961074	0.958593	0.935317	0.966794	0.979713	0.945471	0.952537	0.969555	0.965445	0.975816	0.952468	0.966633	0.969566	0.940646	0.966264	0.893423	0.952355	0.959938	0.966682	0.98035	0.944244	0.94672	0.962711	0.870705	0.938282	0.951419	0.955073	0.958062	0.96423	0.959778	0.967711	0.946711	0.952244	0.957451	0.882032	0.927953	0.957043	0.909118	0.954135	0.967167	0.878336	0.962717	0.961881	0.972683
1	49	0	0	0	0	0	0	0	0	0	0	0	0	0	0	0	0	0	0	0	0	0	0	0	0	0	0	0	0	0	0	0	0	0	0	0	0	0	0	0	0	0	0	0	0	0	0	0	0
5	49	0	1	0	1	0	0	0	1	0	0	0	0	0	0	0	0	0	0	0	0	1	0	0	0	0	0	1	0	1	0	1	0	0	0	0	0	0	0	0	0	0	0	1	0	0	0	0	0
10	49	0	0	0	0	0	0	0	0	0	0	0	0	0	0	0	0	0	1	0	0	0	0	0	0	0	0	1	0	1	0	0	0	0.993691	0	0	0	0	0	0	0	0	0	0	0	0	0	0	0
50	49	0.999893	0.999871	0	0	0	0.999989	0	0	0	1	0.999597	0.997514	0	0	0	0	0	0	0.995402	0	0	0	1	0.997065	0	0.99883	0	0.999999	0	0	0	0	0	0.993726	0.999654	0.998483	0	0.994851	0	0	1	0.996331	0	0	0	0	0.999999	0.994986
100	49	0.997905	0	0.998248	0.991071	0.997946	0.999865	0.994429	0	0.98484	0.988004	0.992809	0	0.989296	0.995281	1	0.999933	0.999938	0	0.998551	0.998492	0.983907	0.996719	0.993766	0.994314	0.996024	0	0.995096	0.990947	0.994261	0.99278	0.995121	0.997671	0.996929	0	0.996254	0.994179	0	0	0.989169	0.997244	0.999999	0.994521	0.989163	0.995097	0	0	0.97833	0.994333
500	49	0.993656	0.997531	0.991455	0.997401	0.989381	0.99649	0.998255	0.991252	0.975001	0.995828	0.975846	0.991757	0.991024	0.967944	0.993501	0.99809	0.991358	0.987105	0.997453	0.997014	0.998048	0.993136	0.988049	0.991259	0.997302	0.977839	0.987631	0.996142	0.991144	0.989991	0.992163	0.9957	0.995423	0.988745	0.993567	0.994732	0.995919	0.996817	0.993918	0.992845	0.997231	0.995814	0.978578	0.997161	0.997095	0.93535	0.995017	0.997857
1000	49	0.996225	0.99761	0.993859	0.989547	0.996086	0.996537	0.995534	0.990892	0.994973	0.994646	0.995074	0.993518	0.996141	0.985632	0.993657	0.973355	0.994551	0.994076	0.994534	0.989968	0.99236	0.992382	0.995072	0.992593	0.980295	0.99215	0.996264	0.996942	0.994443	0.994781	0.995042	0.994902	0.996663	0.981061	0.995478	0.995253	0.995651	0.986106	0.995384	0.995668	0.99644	0.994321	0.992253	0.996221	0.992644	0.993075	0.990075	0.997935
[truncated: 52 more columns]
