# Supplementary material for: Spatio-temporal control of mutualism in legumes helps spread symbiotic nitrogen fixation
Source: eLife. 2017 Oct 12;6:e28683. doi: 10.7554/eLife.28683 (PMC5687860; doi:10.7554/eLife.28683)
Supplement: Figure 10—source data 1. [file elife-28683-fig10-data1.xlsx]

## Sheet: Feuil1
Figure 10-Source Data 11. Simulation data for the frequency of Fix+ bacteria over 4 cycles of 35 or 21 days.
Figure 10A-Source Data for 35 day cycles
Simulations were run for 4 cycles of 35 days, starting with 1% Fix+ and with 20 plants per pool.
The proportion of Fix+ bacteria after each cycle is indicated for each of the 100 replicate pools of plants (numbered V1 to V100).
	V1	V2	V3	V4	V5	V6	V7	V8	V9	V10	V11	V12	V13	V14	V15	V16	V17	V18	V19	V20	V21	V22	V23	V24	V25	V26	V27	V28	V29	V30	V31	V32	V33	V34	V35	V36	V37	V38	V39	V40	V41	V42	V43	V44	V45	V46	V47	V48	V49
Cycle 1	0.0908708	0.0396067	0.14805	0.0448042	0	0.0156259	0.0727609	0.0491356	0.0708986	0.0783684	0.0954471	0.00115731	0.0735513	0.114156	0.11452	0.214909	0.041068	0.146401	0.121803	0.100321	0.178819	0.0794403	0.104016	0.0367546	0.0602588	0.140196	0.0986086	0.195027	0.120774	0.19064	0	0.0513111	0.121821	0.0586898	0.0836822	0.119508	0.041325	0.0587925	0	0.0405644	2.33733e-09	0.152716	0.0455867	0.12572	0.0339953	0.044725	0.100669	0.137387	0.042411
Cycle 2	0.487181	0.270516	0.649302	0.324251	0	0.0770694	0.286807	0.324065	0.415638	0.439642	0.239137	0	0.279371	0.56279	0.504963	0.6451	0.0083559	0.597978	0.5677	0.389513	0.666575	0.474045	0.509061	0.197869	0.348199	0.545678	0.308499	0.623757	0.515071	0.76214	0	0.515476	0.63146	0.353945	0.403639	0.635044	0.357994	0.242949	0	0.206894	0	0.535092	0.221653	0.513916	0.0427721	0.239632	0.553003	0.659132	0.118868
Cycle 3	0.931742	0.757515	0.978723	0.768324	0	0.368269	0.79108	0.751788	0.915999	0.907901	0.742949	0	0.796976	0.872655	0.947594	0.965295	7.19196e-06	0.952312	0.937744	0.86945	0.94507	0.872246	0.903045	0.713746	0.867314	0.911823	0.739131	0.971407	0.882926	0.975972	0	0.904888	0.97327	0.803287	0.868596	0.911413	0.802139	0.776832	0	0.743795	0	0.968313	0.731035	0.875107	0.139224	0.682159	0.924381	0.942051	0.511816
Cycle 4	0.999716	0.994181	1	0.987755	0	0.921917	0.971868	0.989293	0.996198	0.988184	0.968711	0	0.963928	0.99951	1	0.999995	0	0.999938	0.985896	0.980252	0.991723	0.998451	0.991168	0.97221	0.999641	0.998889	0.97951	0.991185	0.981795	1	0	0.99054	0.981809	0.985482	0.99772	0.990575	0.972789	0.995333	0	0.986206	0	0.999926	0.985087	0.999612	0.691985	0.953006	0.992614	0.996511	0.891748
Figure 10B-Source_Data for 21 day cycles
Simulations were run for 4 cycles of 21 days, starting with 1% Fix+ and with 20 plants per pool.
The proportion of Fix+ bacteria after each cycle is indicated for each of the 100 replicate pools of plants (numbered V1 to V100).
	V1	V2	V3	V4	V5	V6	V7	V8	V9	V10	V11	V12	V13	V14	V15	V16	V17	V18	V19	V20	V21	V22	V23	V24	V25	V26	V27	V28	V29	V30	V31	V32	V33	V34	V35	V36	V37	V38	V39	V40	V41	V42	V43	V44	V45	V46	V47	V48	V49
Cycle 1	0.0363802	0	2.53385e-08	0.0606908	0.042157	0.0455111	0.015389	0.0723454	1.77067e-09	0.00135872	0.0386654	0.0388011	0	5.96246e-06	9.0229e-05	0	0.0524333	0.0564812	0.0854148	0.0150838	0.0365018	0.0351914	0.115557	2.87661e-08	2.66334e-05	0	0.0399371	4.63138e-06	0.0306001	0.135827	0.0288387	0.085865	0	0	0	0.0346023	0	0.0287791	1.87121e-05	0.0298776	0	0.000379161	0	0.0264605	0	0	9.64493e-08	1.60068e-06	2.16642e-05
Cycle 2	0.13717	0	0	0.136127	0.0625362	0.0276623	0.0397833	0.0787538	0	0	0.0860207	0.0972793	0	0	0	0	0.084533	0.0424291	0.256466	0.0333645	0.073049	0.107192	0.101941	0	0	0	0.108304	0	0.0655542	0.205263	0.0669059	0.281203	0	0	0	0.0381023	0	0.0296989	0	0.0462056	0	0	0	0.123711	0	0	0	0	0
Cycle 3	0.184357	0	0	0.324893	0.0620522	0.0342765	0.0886456	0.118567	0	0	0.167401	0.236272	0	0	0	0	0.168981	0.163981	0.448641	0.0600003	0.209735	0.24624	0.242675	0	0	0	0.241993	0	0.102079	0.382844	0.269873	0.554099	0	0	0	0.103709	0	0.16234	0	0.091586	0	0	0	0.278305	0	0	0	0	0
Cycle 4	0.447979	0	0	0.57803	0.287063	0.00159712	0.19095	0.170395	0	0	0.378624	0.509742	0	0	0	0	0.329451	0.350376	0.671043	0.188102	0.414932	0.370533	0.396131	0	0	0	0.503688	0	0.320997	0.538667	0.67691	0.793888	0	0	0	0.307782	0	0.461954	0	0.264215	0	0	0	0.39919	0	0	0	0	0
[truncated: 53 more columns]
