# Supplementary material for: Spatio-temporal control of mutualism in legumes helps spread symbiotic nitrogen fixation
Source: eLife. 2017 Oct 12;6:e28683. doi: 10.7554/eLife.28683 (PMC5687860; doi:10.7554/eLife.28683)
Supplement: Figure 10—source data 2. [file elife-28683-fig10-data2.xlsx]

## Sheet: Feuil1
Figure 10-Source Data 12. Experimental data for the frequency of Fix+ and Fix- bacteria over 4 cycles of 35 or 21 days.
Number of biological replicate: each series of cycles was performed once. The number of plants used for each cycle is indicated.
		Percentage of bacteria in nodule population
21 day cycles	No. Plants	% Fix+ bacteria	% Fix- bacteria
Inoculation	20	0.01	0.99
cycle 1	20	0.0257794	0.974221
cycle 2	20	0.252019	0.747981
cycle 3	20	0.219965	0.780035
cycle 4	20	0.587314	0.412686
		Percentage of bacteria in nodule population
35 day cycles	No. Plants	% Fix+ bacteria	% Fix- bacteria
Inoculation	20	0.01	0.99
cycle 1	20	0.123172	0.876828
cycle 2	20	0.345262	0.654738
cycle 3	20	0.679088	0.320912
cycle 4	20	0.995223	0.00477707

## Sheet: Feuil2
Cycle	Number of bacteria inoculated per tube of plants	Total number of bacteria isolated from nodule population
cycle 1-35d	1000000	6.57617e+08
cycle 2-35d	6.57617e+06	1.59782e+09
cycle 3-35d	1.59782e+07	3.6147e+09
cycle 4-35d	3.6147e+07	4.18667e+09
